# Ccn2a is an injury-induced matricellular factor that promotes cardiac regeneration in zebrafish

Debanjan Mukherjee<sup>1,\*</sup>, Ganesh Wagh<sup>1,2</sup>, Mayssa H. Mokalled<sup>3,†</sup>, Zacharias Kontarakis<sup>4,§</sup>, Amy L. Dickson<sup>3</sup>, Amey Rayrikar<sup>1,2</sup>, Stefan Günther<sup>5</sup>, Kenneth D. Poss<sup>3</sup>, Didier Y. R. Stainier<sup>4</sup> and Chinmoy Patra<sup>1,¶</sup>

## ABSTRACT

The ability of zebrafish to heal their heart after injury makes them an attractive model for investigating the mechanisms governing the regenerative process. In this study, we show that the gene *cellular communication network factor 2a* (*ccn2a*), previously known as *ctgfa*, is induced in endocardial cells in the injured tissue and regulates CM proliferation and repopulation of the damaged tissue. We find that, whereas in wild-type animals, CMs track along the newly formed blood vessels that revascularize the injured tissue, in *ccn2a* mutants CM proliferation and repopulation are disrupted, despite apparently unaffected revascularization. In addition, we find that *ccn2a* overexpression enhances CM proliferation and improves the resolution of transient collagen deposition. Through loss- and gain-of-function as well as pharmacological approaches, we provide evidence that Ccn2a is necessary for and promotes heart regeneration by enhancing the expression of pro-regenerative extracellular matrix genes, and by inhibiting the chemokine receptor gene *cxcr3.1* through a mechanism involving Tgfβ/pSmad3 signaling. Thus, Ccn2a positively modulates the innate regenerative response of the adult zebrafish heart.

**KEY WORDS:** Ccn2a, Ctgf, Heart regeneration, Zebrafish, Extracellular matrix, TGFβ

## INTRODUCTION

Heart disease is the leading cause of death in industrialized nations [https://www.who.int/news-room/fact-sheets/detail/cardiovascular-diseases-(cvds)]. Adult mammalian hearts fail to regenerate after myocardial damage, typically leading to persistent scarring and reduced heart function (Engel et al., 2006; Doppler et al., 2017). In contrast, zebrafish can regenerate their injured myocardium through cardiomyocyte (CM) proliferation (Poss et al., 2002) aided by a specific immune response (Hui et al., 2017; Lai et al., 2017) and the ability to clear transient collagen deposition (Poss et al., 2002;

González-Rosa et al., 2011) (Fig. 1A). Like zebrafish, neonatal mice exhibit a robust capacity for heart regeneration for a few days after birth (Porrello et al., 2011). A low level of CM proliferation can also be detected in adult humans (Bergmann et al., 2009) and mice (Senyo et al., 2013). Another study has provided evidence that, in humans, a high level of CM cytokinesis can be detected in infants, which was not visible after 20 years of age (Mollova et al., 2013). Importantly, Mohamed et al. (2018) have reported that overexpression of a combination of cell cycle regulators can induce cell division in post-mitotic human cardiomyocytes. These observations have led to the recent hypothesis that adult mammals, including humans, which have a limited heart regeneration capacity, could be induced to regenerate cardiac tissue by identifying and activating regenerative genes.

Historically, the extracellular matrix (ECM) was thought to serve as an inert scaffold, providing mechanical support to tissues. However, work in recent decades suggests that the ECM plays vital roles in regulating signaling cascades involved in organ development (O’Shea et al., 1990; Fogerty et al., 1994; Linton et al., 2007; Li et al., 2014), maintenance (Fang et al., 2010), disease (Sasaki et al., 2001; Jacobetz et al., 2013; Saupé et al., 2013) and regeneration (González-Rosa et al., 2011; Wang et al., 2013; Bassat et al., 2017; Wehner et al., 2017). To identify potential pro-regenerative ECM genes, we screened various extracellular genes that are induced in the zebrafish heart at 4 days post cryoinjury (dpi). This small-scale candidate gene screen identified nine ECM genes whose expression was significantly increased at 4 dpi (Fig. 1B and Table S1). A few of these genes, including *periostin a* (*postna*) have been reported to induce cardiac regeneration in mammalian models (Kuhn et al., 2007; Ladage et al., 2013). Other hits from our screen, such as *osteopontin* (*spp1*) and *tenascin C* (*tncc*), have previously been reported to be expressed in dilated cardiomyopathy patients (Satoh et al., 2005; Yokokawa et al., 2016). Recently, Pfefferli and Jaźwińska showed that *cellular communication network factor 2a* (*ccn2a*) [previously known as *connective tissue growth factor a* (*ctgfa*)] is expressed in injured zebrafish cardiac tissue (Pfefferli and Jaźwińska, 2017).

In our injury-induced ECM screen, the expression of both paralogs of *cellular communication network factor 2* (*CCN2*; *ccn2a* and *ccn2b*) were increased in the regenerating heart, suggesting a function during cardiac regeneration. Many studies suggest that, in mammals, CCN2 expression is related to the progression of hepatic (Tamatani et al., 1998), renal (Jaffa et al., 2008), skin (Mori et al., 1999), lung (Ponticos et al., 2009) and cardiac (Dean et al., 2005; Angelini et al., 2015) fibrosis. Recent reports indicate that CCN2 promotes ligament regeneration in rabbits (Zhang et al., 2017), β-cell proliferation in mice (Riley et al., 2015) and spinal cord regeneration in zebrafish (Mokalled et al., 2016). Graving et al. showed that transgenic overexpression of CCN2 in the permanent coronary artery ligation mouse model partially protected the heart from scarring and cardiac function deterioration, suggesting a

<sup>1</sup>Department of Developmental Biology, Agharkar Research Institute, Pune 411004, India. <sup>2</sup>SP Pune University, Pune 411007, India. <sup>3</sup>Regeneration Next, Department of Cell Biology, Duke University Medical Center, Durham, NC 27710, USA. <sup>4</sup>Max Planck Institute for Heart and Lung Research, Department of Developmental Genetics, Bad Nauheim 61231, Germany. <sup>5</sup>ECCPS Bioinformatics and Deep Sequencing Platform, Max Planck Institute for Heart and Lung Research, Bad Nauheim 61231, Germany.

\*Present address: Institute of Cardiovascular Regeneration, Goethe University, Frankfurt 60590, Germany. †Present address: Washington University School of Medicine, St Louis, MO 63110, USA. §Present address: Functional Genomics Center Zurich, Zurich 8057, Switzerland.

¶Author for correspondence (cpatra@aripune.org)

DOI: 10.1242/dev.193219; D.M., 0000-0002-0788-6460; M.H.M., 0000-0002-3712-351X; D.Y.R.S., 0000-0002-0382-0026; C.P., 0000-0003-3997-8607

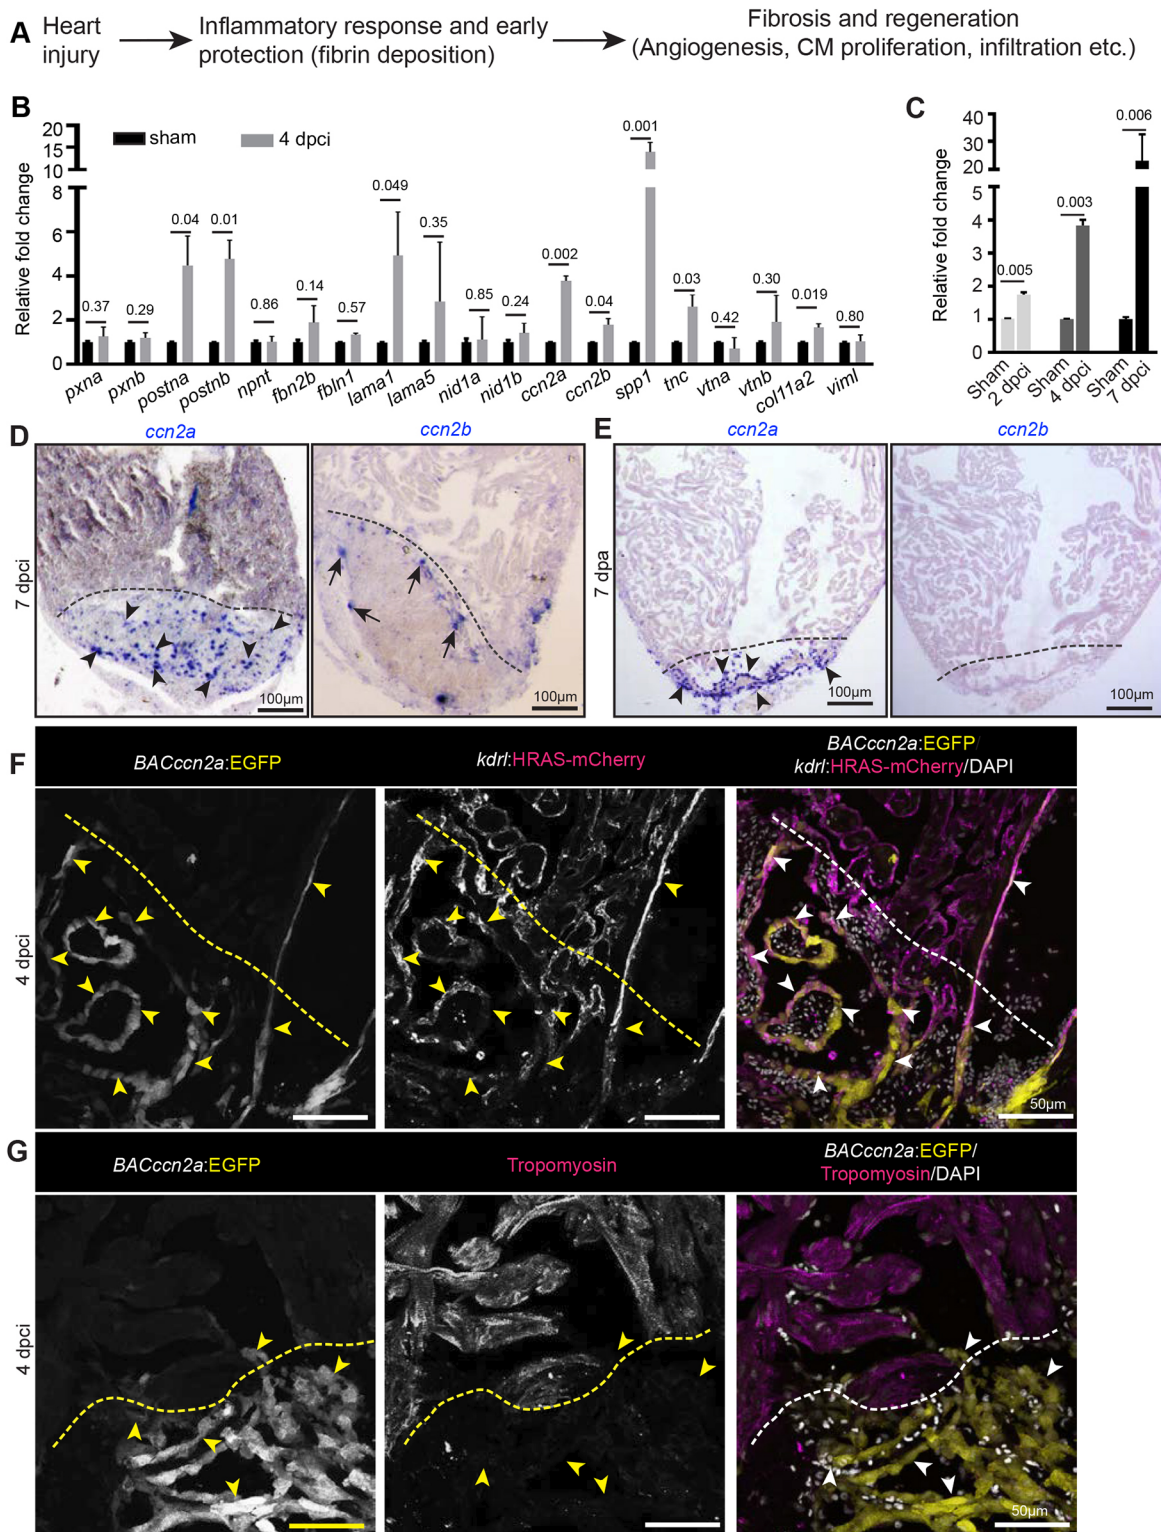

**Fig. 1. *ccn2a* is expressed by endocardial cells in injured zebrafish hearts.** (A) Schematic depiction of the known processes involved in heart regeneration. (B,C) qPCR-based small-scale screen to identify dynamically expressed extracellular matrix genes in 4 dpci adult zebrafish hearts (B), and qPCR analysis of *ccn2a* expression during the early stages of heart regeneration (C) ( $n=3$ , each sample represents a pool of 6 hearts). Data are mean $\pm$ s.d. Values are normalized to the mean of the sham control. The statistical significance of differences was evaluated using a two-tailed Student's *t*-test (GraphPad Prism). Mean Ct values are provided in Table S4. (D,E) Representative images of *ccn2a* and *ccn2b* expression on sagittal sections of 7 dpci (D) and 7 dpa (E) adult zebrafish hearts. Arrowheads and arrows indicate *ccn2a*- and *ccn2b*-expressing cells in the injured tissue, respectively. (F) *BACccn2a:EGFP* and *kdrt:HRAS-mCherry* expression in a sagittal section of a 4 dpci heart. Arrowheads indicate EGFP expression overlapping with mCherry positive-cells in the injured tissue. (G) *BACccn2a:EGFP* expression and tropomyosin (magenta; marks CMs) immunostaining on a sagittal section of a 4 dpci heart. Arrowheads indicate EGFP-expressing cells. Dashed lines indicate the wound border. dpci, days post cryoinjury; dpa, days post amputation.



beneficial role for CCN2 after cardiac injury (Gravning et al., 2012). In contrast, a recent report suggests that perturbation of CCN2 levels by deletion or overexpression does not affect cardiac fibrosis or remodeling in the adult mouse heart subjected to multiple acute stresses (Accornero et al., 2015). Taken together, the reported functions of CCN2 in organ/cardiac regeneration appear contradictory. Here, we have sought to explore the role of Ccn2a in heart regeneration in adult zebrafish.

We show that, upon cardiac injury in adult zebrafish, *ccn2a* expression is induced in endocardial cells in the injured tissue. In wild-type animals CMs track along new coronary vessels into the wound, as previously shown (Marín-Juez et al., 2019). Upon loss of *ccn2a*, there is a decrease in CM proliferation and diminished CM tracking along the new coronary vessels, thereby disrupting cardiac muscle regeneration. Consistent with this observation, *ccn2a* overexpression enhances CM proliferation and expedites the resolution of collagenous tissue. Molecular analysis shows that Ccn2a regulates heart regeneration by positively regulating pSmad3 signaling and a subset of its downstream targets, including ECM genes and the *cxc3.1* chemokine receptor gene. Thus, our study finds that Ccn2a is necessary for heart regeneration in zebrafish, and that it can accelerate this process by promoting CM proliferation and repopulation of the injured tissue via the upregulation of pSmad3 signaling.

## RESULTS

### ***ccn2* expression is induced in the zebrafish heart upon cardiac injury**

We first analyzed mRNA levels of ECM genes using total RNA isolated from sham or 4 dpci whole cardiac ventricles. The expression levels of selected genes were normalized to *efl1a*. Our qPCR-based screen found that, in adult zebrafish cardiac ventricles, the mRNA levels of both paralogs of the CCN2 gene (*ccn2a* and *ccn2b*) were upregulated upon cardiac injury (Fig. 1B), although the mRNA levels of *ccn2b* were much lower compared with those of *ccn2a* (Fig. S1A). On a temporal scale, *ccn2a* expression in cardiac ventricles was found to be upregulated starting at 2 dpci onwards during the early stages of heart regeneration (Fig. 1C). Spatial RNA expression analysis by *in situ* hybridization showed that *ccn2a* was expressed in the primordial layer and cortical myocardium of the uninjured adult cardiac ventricle. However, *in situ* hybridization failed to detect *ccn2b* transcripts in the uninjured cardiac ventricle (Fig. S1B).

We studied the spatiotemporal expression of *ccn2a* and *ccn2b* in injured heart tissue in two cardiac regeneration models: the cryoinjury model, where a large amount of transient collagen accumulates in the injured tissue (González-Rosa et al., 2011); and the ventricular resection model, where limited amounts of transient collagen deposits along the resection plane (Poss et al., 2002). Upon cryoinjury, at 7 dpci, *ccn2a* transcripts were predominantly induced in the injured tissue (Fig. 1D). The expression pattern of *ccn2a* in the uninjured part of the ventricle (>200 µm away from the wound edge) did not appear to be affected (Fig. S1C). Similarly, in the amputation model, *ccn2a* transcripts were found predominantly in the wound region from 3 to 14 days post-amputation (dpa) (Fig. 1E and Fig. S1D). Corroborating the qPCR data, in both injury models, *ccn2b* was detected only in the border zone with relatively lower expression than its paralog (Fig. 1D,E and Fig. S1E).

To further investigate the expression pattern of *ccn2a*, we generated a *TgBAC(ccn2a:EGFP)* reporter line (*BACccn2a<sup>pp01</sup>*) using a bacterial artificial chromosome (BAC), where EGFP was placed at the start codon of *ccn2a* and was flanked by a ~53-kb

upstream regulatory genomic sequence and a ~110-kb downstream genomic sequence (Fig. S2A,B). The EGFP expression pattern in uninjured and injured *TgBAC(ccn2a:EGFP)* hearts resembled the endogenous *ccn2a* mRNA expression observed by *in situ* hybridization (Fig. 1F,G and Fig. S2C,D). Relatively weak *TgBAC(ccn2a:EGFP)* expression was observed along the primordial layer and in a few cells in the cortical myocardium of the uninjured heart (Fig. S2C). Interestingly, upon injury *TgBAC(ccn2a:EGFP)*-positive cells were prominently detected in the injured tissue (Fig. S2D). At 4 dpci, *TgBAC(ccn2a:EGFP)*-expressing cells largely overlapped with *kdr1<sup>+</sup>* endocardial cells at the injury site (Fig. 1F). However, at this stage, the CMs at the border zone remained devoid of *TgBAC(ccn2a:EGFP)* expression (Fig. 1G). Overall, *ccn2a* expression appears to be induced upon injury and is observed mainly in endocardial cells in the injured cardiac tissue.

### ***ccn2a* is necessary for zebrafish heart regeneration after cardiac injury**

To explore the role of Ccn2a in heart regeneration, we employed a loss-of-function *ccn2a* mutant allele (the *ctgfa<sup>bns50</sup>* allele referred to as *ccn2a<sup>-/-</sup>*) (Mokalled et al., 2016). *ccn2a<sup>-/-</sup>* animals develop into viable adults with no visible structural abnormalities in the heart. However, upon cryoinjury, *ccn2a<sup>+/-</sup>* and *ccn2a<sup>-/-</sup>* animals showed impaired heart regeneration. We used a semi-quantitative method to measure regeneration by scoring for the presence of the collagenous scar in heart sections taken at 60 and 150 dpci. This analysis revealed that, although ~60% of wild-type injured hearts show vigorous regeneration at 60 dpci, all *ccn2a<sup>-/-</sup>* and ~50% of *ccn2a<sup>+/-</sup>* injured hearts displayed minimal regeneration at this stage, evident by the presence of a large collagenous scar at the site of injury (Fig. 2A,C). Interestingly, a persistent collagenous scar was observed in ~14% *ccn2a<sup>+/-</sup>* and 60% *ccn2a<sup>-/-</sup>* hearts, even at 150 dpci (Fig. 2B,D), indicating that these phenotypes are not merely delays in regeneration but are indicative of poor repair. Similarly, in the ventricular resection model, *ccn2a<sup>-/-</sup>* animals showed a reduction in the efficiency of heart regeneration at 30 dpa (Fig. 2E,F). As heterozygous animals also showed poor heart regeneration, we measured expression levels of *ccn2a* transcripts in *ccn2a<sup>+/+</sup>*, *ccn2a<sup>+/-</sup>* and *ccn2a<sup>-/-</sup>* embryos at 48 hpf. Our qPCR analysis showed ~60% and 34% transcripts are present in *ccn2a<sup>+/-</sup>* and *ccn2a<sup>-/-</sup>* animals, respectively, relative to the wild-type embryos (Fig. 2G). Given the nature of the mutation, we cannot formally rule out the possibility that the mutant allele gives rise to a truncated protein. Nevertheless, more severe cardiac phenotype in *ccn2a<sup>-/-</sup>* animals compared with *ccn2a<sup>+/-</sup>* siblings and the decrease in transcript level in the heterozygous and mutants suggest that the phenotype is likely to be associated with loss of gene function. Together, these results thus support a necessary role for Ccn2a in heart regeneration.

### **Cardiomyocytes fail to track along new coronary vessels in *ccn2a* mutants post-cardiac injury**

Much remains to be learned about how CMs repopulate a cardiac wound. An earlier study by Itou et al. used a photoconvertible protein, Kaede, to reveal evidence for CM migration after resection injury, and suggested that this process is required for heart regeneration (Itou et al., 2012). Published evidence also indicates that new coronary vessel formation starts as early as 15 h post cryoinjury (hpci) (Marín-Juez et al., 2016) and is crucial for heart regeneration (Harrison et al., 2015). As *ccn2a* transcripts are detected during the early stages post-injury, we sought to investigate the role of Ccn2a in coronary angiogenesis and CM colonization at the site of injury. To explore the relationship between coronary

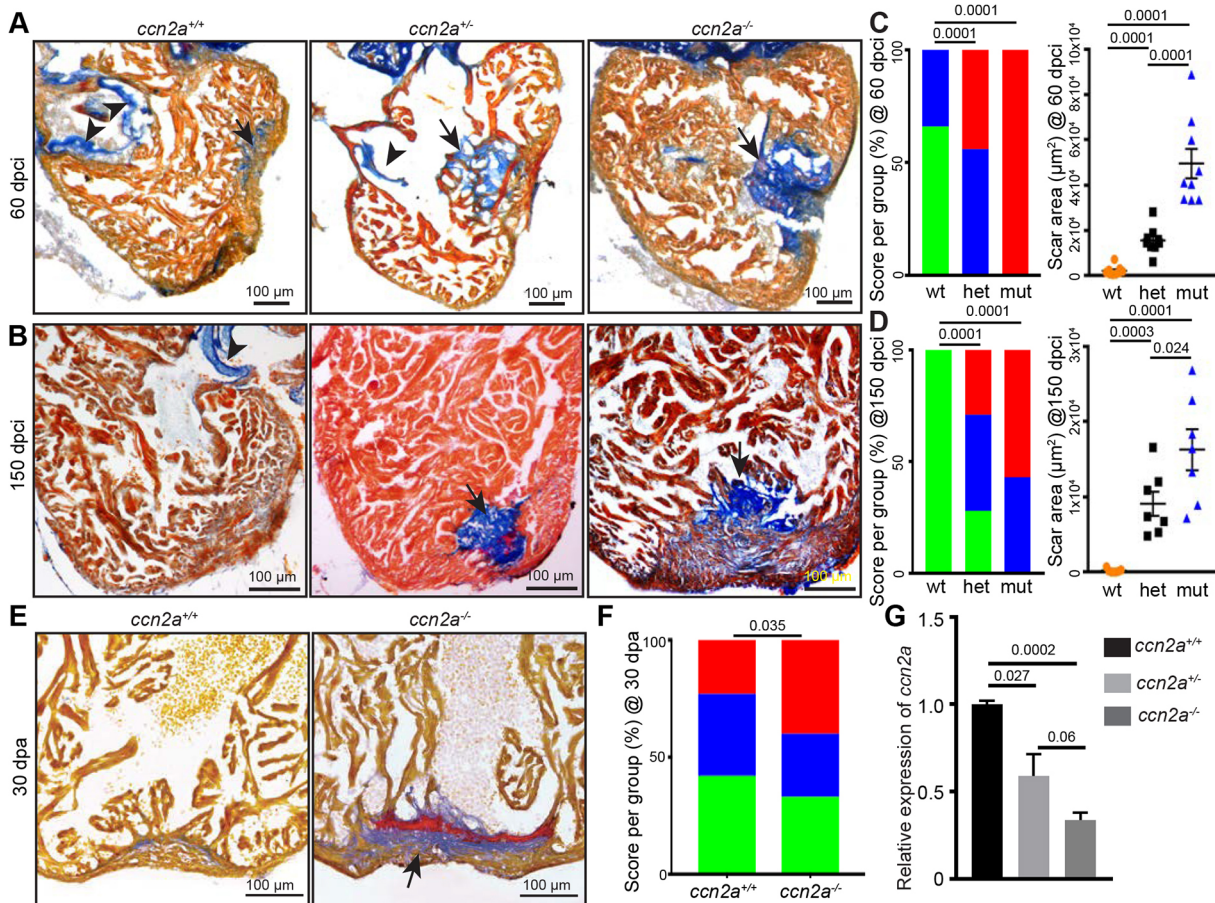

**Fig. 2. *ccn2a* mutant hearts exhibit increased scarring after injury.** (A,B) Representative bright-field images of 12  $\mu$ m sagittal paraffin sections of 60 dpci (A) and 150 dpci (B) hearts stained with acid fuchsin-orange G (AFOG); muscle, yellowish red; fibrin, brick red; collagen, blue). Arrows and arrowheads indicate the collagenous scar and atrioventricular valves, respectively. (C,D) Semi-quantitative analysis of scarring in *ccn2a*<sup>+/+</sup>, *ccn2a*<sup>+/-</sup> and *ccn2a*<sup>-/-</sup> hearts ( $n=9$  each) at 60 dpci (C), and *ccn2a*<sup>+/+</sup>, *ccn2a*<sup>+/-</sup> and *ccn2a*<sup>-/-</sup> hearts ( $n=7$  each) at 150 dpci (D). Color-coded bar chart indicates the degree of regeneration: green, complete; blue, moderate; red, very poor. Data indicate the percentage of total hearts represented by each score. The statistical significance of differences was evaluated by a wound-recovery  $\chi^2$  test. Dot plots show highest area covered by collagenous scar on a tissue section from each heart. Data are mean $\pm$ s.e.m. (E) Sagittal sections of 30 dpa ventricles stained with AFOG. Example of a vigorously regenerating *ccn2a*<sup>+/+</sup> heart and a poorly regenerating *ccn2a*<sup>-/-</sup> heart section. Arrow indicates the collagenous scar. (F) Semi-quantitative analysis of wound recovery in 25 *ccn2a*<sup>+/+</sup> and 30 *ccn2a*<sup>-/-</sup> animals. Average of area covered by collagen on three histological sections in each heart was considered for scar quantification. Color-coded bar chart indicates degree of regeneration: green, complete; blue, moderate; red, very poor. Data indicate the percentage of total hearts represented by each score. The statistical significance of differences was evaluated by a wound-recovery  $\chi^2$  test. (G) qPCR analysis of *ccn2a* transcripts in 48 hpf embryos from three genotypes. Values are normalized to the mean of the wild type. Data are mean $\pm$ s.d. dpci, days post cryoinjury; dpa, days post amputation; hpf, hours post fertilization.

angiogenesis and CM infiltration into the wound, we used double-transgenic [Tg(*etv2*:EGFP)/Tg(*myl7*:nucDsRed)] (Mably et al., 2003; Proulx et al., 2010) reporter animals that expressed EGFP in endothelial cells and DsRed in CM nuclei. In wild-type cryoinjured hearts, even though new coronary vessels begin to sprout at  $\sim$ 15 hpci (Marín-Juez et al., 2016), we did not observe *myl7*:nucDsRed<sup>+</sup> CMs in the injured tissue of whole-mount heart at this stage (Fig. S3A). Interestingly, at 7 dpci, *myl7*:nucDsRed<sup>+</sup> CMs were visible in the damaged tissue of wild-type hearts with the majority of these cells ( $\sim$ 88%) aligned with the new coronary vessels (Marín-Juez et al., 2019), suggesting that CMs track along the new coronary vessels (Fig. 3A,B). In contrast, in *ccn2a*<sup>-/-</sup> animals, even though coronary angiogenesis after injury appears unaffected, CM repopulation of the cardiac wound was impaired, as evaluated using both whole-mount imaging (Fig. 3A,C and Fig. S3B) and histology (Fig. S3C,D). CM infiltration was also impaired in *ccn2a*<sup>+/-</sup> animals (Fig. S3B). These data suggest that *Ccn2a* is required for CM infiltration into the cardiac wound during regeneration.

In the cryoinjury model, dead tissue persists at the site of injury and is eventually replaced by new tissue. Therefore, it was essential to determine that the appearance of CMs in the injured tissue is due to CMs infiltration into the wound and not because of the proliferation of residual viable CMs. To address this, we examined the process of regeneration using the ventricular resection model, in which heart regeneration occurs through repopulation of the apical wound with CMs (Poss et al., 2002). Our analysis, using whole-mount confocal imaging, showed that new coronary vessels covered the entire apical wound at 4 dpa in wild-type and *ccn2a*<sup>-/-</sup> hearts (Fig. S4A). However, the apical wound remained devoid of *myl7*:nucDsRed<sup>+</sup> CMs at this stage in both genotypes (Fig. S4A,B). Corroborating the cryoinjury model, at 7 dpa, *myl7*:nucDsRed<sup>+</sup> CMs were visible in the apical wound of wild-type hearts (Fig. 3D,E), as previously shown (Lepilina et al., 2006), and most of these cells were positioned along the new coronary vessels (Fig. 3D,E), suggesting that coronary angiogenesis precedes the appearance of CMs in the injured tissue and that these



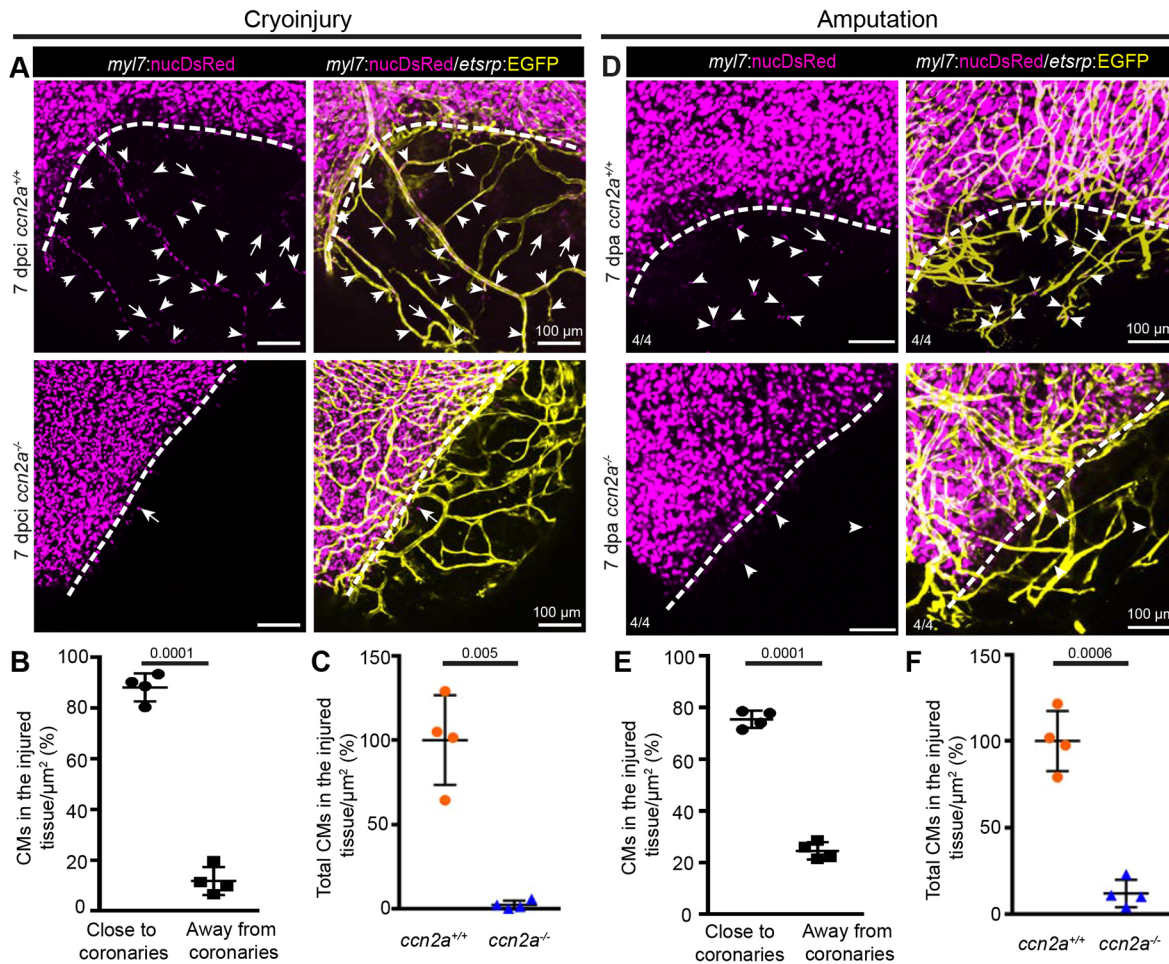

**Fig. 3. Cardiomyocyte tracking along new coronary vessels into injured tissue fails in *ccn2a* mutants.** (A) Maximum intensity projections of confocal images of freshly isolated whole-mount heart evaluated for coronary angiogenesis and CM tracking along the new coronary vessels into the injured tissue. DsRed expression marks CM nuclei (magenta); EGFP expression marks coronary vessels (yellow). Arrowheads and arrows indicate CMs along and distant from new coronary vessels in the injured tissue, respectively. Dotted lines indicate the injury border. (B) Analysis of the percentage of the total infiltrated CMs observed along and distant from coronary vessels in the injured tissue quantified in wild-type whole-mount hearts ( $n=4$ ). The total number of infiltrated CMs in the injured tissue of each sample was considered as 100%. (C) A comparison of the total infiltrated CMs in wild-type and *ccn2a* mutant whole-mount hearts at 7 dpci ( $n=4$ ). The average for wild type was considered to be 100%. Data are mean $\pm$ s.d. (D) Representative maximum intensity projections of confocal images of whole-mount heart freshly isolated at 7 dpa. DsRed marks CM nuclei; EGFP marks coronary vessels. Arrowheads and arrows indicate CMs residing along and distant from, respectively, new coronary vessels in the wound. Dotted lines indicate the wound border. (E) Analysis of the percentage of the total infiltrated CMs seen along and distant from coronary vessels in the injured tissue quantified in whole-mount wild-type hearts ( $n=4$ ). Total number of CMs in the injured tissue of each sample was considered to be 100%. (F) A comparison of the total number of CMs in the injured tissue of wild-type and *ccn2a* mutant whole-mount hearts at 7 dpa. The average for wild type ( $n=4$ ) was considered to be 100%. Data are mean $\pm$ s.d. The statistical significance of differences was evaluated by a two-tailed Student's *t*-test (GraphPad Prism). Thickness of maximum intensity projections: 30 to 40  $\mu\text{m}$ .

cells track along the new coronary vessels. Moreover, similar to the cryoinjury model, CM infiltration into the injured tissue was impaired in *ccn2a<sup>-/-</sup>* hearts (Fig. 3D-F and Fig. S5A,B). Taken together, our data suggest that CMs track along new coronary vessels into damaged tissue and that *Ccn2a* is required for these events but not for coronary angiogenesis during heart regeneration.

#### ***ccn2a* is required for CM proliferation in injured hearts**

One of the factors affecting regeneration in injured *ccn2a<sup>-/-</sup>* hearts could be inefficient CM proliferation. We therefore performed a 5-ethynyl-2'-deoxyuridine (EdU) incorporation assay with the cryoinjury model to quantify CM proliferation indices. EdU incorporation by CM nuclei (*myl7:nucDsRed<sup>+</sup>*) was estimated in whole-mount hearts and sagittal sections. Whole-mount assessments revealed ~75%, 90% and 60% reductions in CM

proliferation in *ccn2a<sup>-/-</sup>* hearts relative to wild-type hearts at 4, 7 and 12 dpci, respectively (Fig. 4A,B and Fig. S6). Although CM proliferation was not affected in 4 dci *ccn2a<sup>+/-</sup>* hearts, an ~65% reduction in CM proliferation was detected in *ccn2a<sup>+/-</sup>* hearts relative to wild-type hearts at 7 and 12 dpci (Fig. 4A,B and Fig. S6). Proliferation of non-CMs in 7 dpci hearts remains indistinguishable among the three genotypes (Fig. 4C). As laser scanning confocal microscopy can detect signals from a maximum tissue depth of ~20  $\mu\text{m}$ , the whole-mount data thus represents CM proliferation of the cortical myocardium. To determine overall CM cell cycle entry, we analyzed EdU incorporation in sagittal sections of the ventricle at 7 dpci and found an ~90% reduction in the border zone of *ccn2a<sup>-/-</sup>* hearts relative to wild type (Fig. 4C,D). Both *ccn2a<sup>+/-</sup>* and *ccn2a<sup>-/-</sup>* animals displayed abnormal heart regeneration. However, the impairment in heart regeneration capacity was more prominent



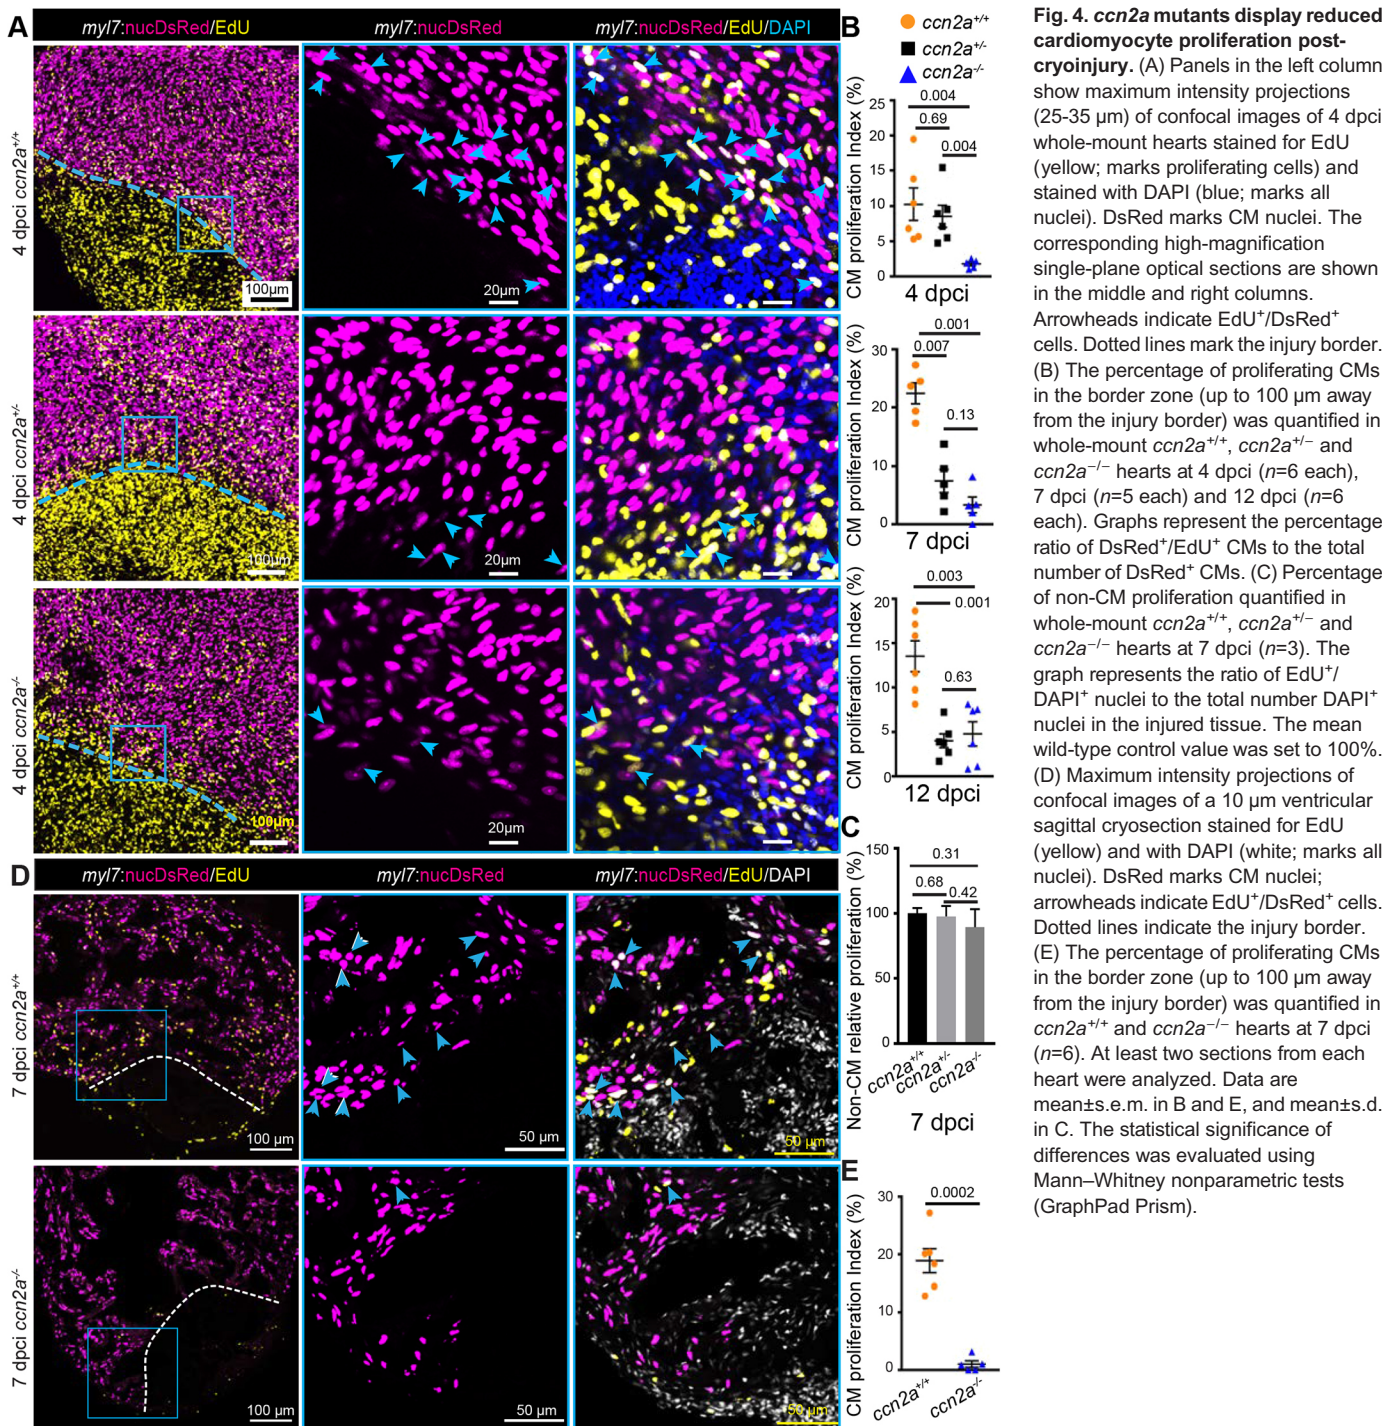

in *ccn2a*<sup>-/-</sup> animals than in *ccn2a*<sup>+/-</sup> siblings, suggesting that the influence of Ccn2a on heart regeneration is dependent on the amount of Ccn2a. To further test the effects of Ccn2a on CM proliferation, we carried out Ccn2a gain-of-function experiments using *hsp70:ctgfa-FL-2a-EGFP* (hereafter *hsp70:ctgfa*) transgenic fish (Mokalled et al., 2016), which express Ccn2a ubiquitously upon heat-shock. Upon cryoinjury, the fish were subjected to daily heat shocks from 1 to 6 dpci and then assessed for CM proliferation (Fig. 5A). EdU incorporation assay revealed a ~45% increase in CM proliferation in the *ccn2a*-overexpressing fish compared with controls (Fig. 5B,C). Continued overexpression of Ccn2a for 1 month diminished scarring in *ccn2a*-overexpressing fish relative to

controls (Fig. 5A,D-F). These results indicate that overexpression of Ccn2a enhances CM proliferation and heart regeneration.

By contrast, when we analyzed the effect of *ccn2a* loss of function on CM proliferation in the ventricular resection model, no significant difference in CM proliferation was detected between wild-type and mutants (Fig. S7). Taken together, these results suggest that, although Ccn2a is a positive regulator of CM infiltration independent of the type of injury, its effect on CM proliferation depends on the type of injury. Nonetheless, the fact that mutant animals display defects in heart muscle regeneration in both injury models indicates the importance of this gene in regeneration.



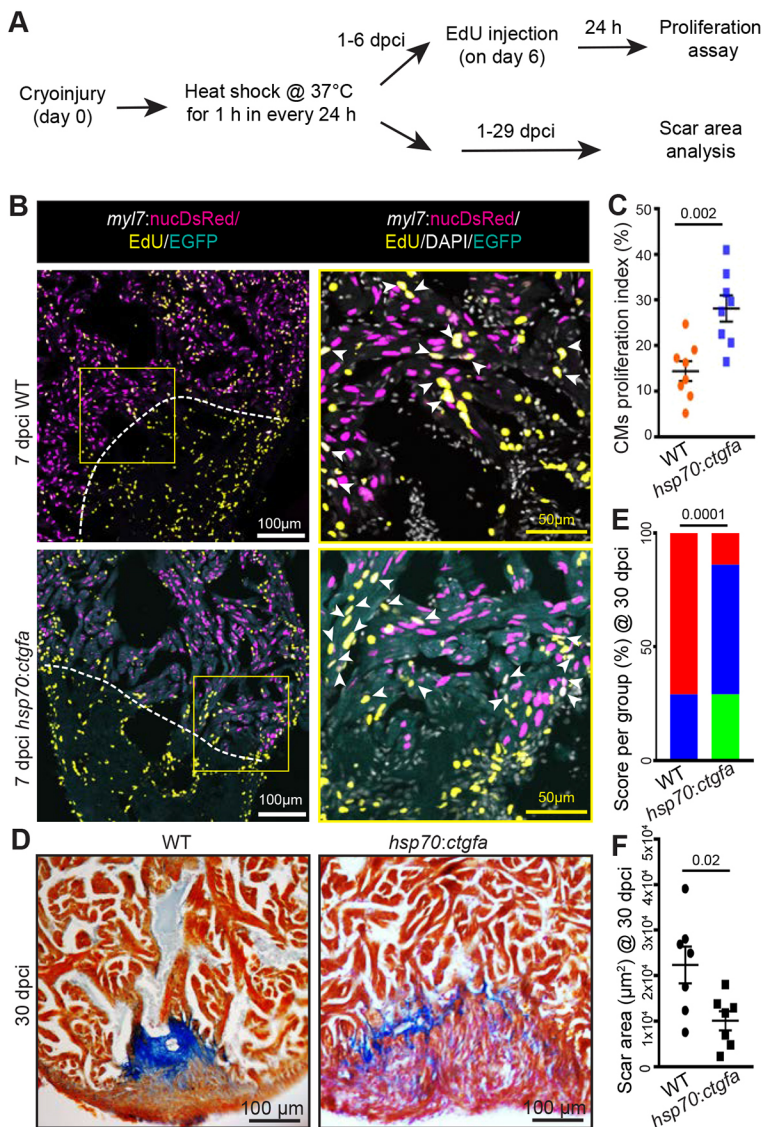

**Fig. 5. Ccn2a promotes cardiomyocyte proliferation and heart regeneration post-injury.** (A) Schematic of the experimental procedures. Post-cryoinjury, wild-type and *ccn2a*-overexpressing transgenic animals were subjected to daily 1 h heat shock. CM proliferation was assessed at 7 dpci and scarring at 30 dpci.

(B) Representative maximum intensity projections of confocal images of 10 μm sagittal cryosections of 7 dpci heart expressing DsRed in CM nuclei, immunostained for EGFP (cyan; marks cells expressing ectopic Ccn2a), stained for EdU (yellow; marks proliferating cells) and stained with DAPI (white; marks all nuclei). Arrowheads indicate EdU<sup>+</sup>DsRed<sup>+</sup> cells. (C) CM proliferation quantified in wild-type and *ccn2a*-overexpressing (*hsp70:ctgfa*) hearts at 7 dpci (n=8 each). At least two sagittal sections of each heart were analyzed for quantification. (D) Representative bright-field images of 12 μm sagittal paraffin sections of 30 dpci wild-type and *hsp70:ctgfa* hearts stained with AFOG (muscle, yellowish red; fibrin, brick red; collagen, blue). (E) Semi-quantitative analysis of scarring in wild-type and *ccn2a*-overexpressing (*hsp70:ctgfa*) hearts at 30 dpci (n=7 each). The histological section with the largest area covered by collagen in each heart was considered for scar quantification. Color-coded bar chart indicates degree of regeneration: green, complete; blue, moderate; red, very poor. Data indicate the percentage of total hearts represented by each score and the statistical significance of differences was evaluated by a wound-recovery  $\chi^2$  test. (F) Dot plot shows highest area covered by collagenous scar on a tissue section from each heart. Data are mean $\pm$ s.e.m. in C,F.

### Ccn2a regulates ECM gene expression in injured hearts

To identify the underlying molecular mechanisms involving Ccn2a in heart regeneration, we used the cardiac cryoinjury model, as it produced a more severe defect in *ccn2a* mutants. Comparative transcriptomic analysis was performed at 4 dpci to identify potentially affected downstream signaling cascades in injured *ccn2a*<sup>-/-</sup> hearts. Unexpectedly, only seven genes were found to be differentially expressed in *ccn2a*<sup>-/-</sup> hearts compared with wild type (Fig. 6A and Table S2). The expression of these genes was analyzed by qPCR. In line with the RNA-Seq data, the qPCR data showed that the expression levels of the chemokine receptor gene *cxc3.1* were increased by ~50%; those of *coll10a1*, an unannotated gene (*si:rp71-36a1.2*), *ctrb1*, *fl3a1a.1* and *grn1* were decreased by ~50 to 70% in mutant hearts at 4 dpci (Fig. 6B). As collagens and fibronectins are known to be important regulators of heart regeneration (Wang et al., 2013) and our transcriptome analysis showed that *coll10a1a* and *fibronectin type III domain containing 4a* gene expression levels were altered in injured *ccn2a*<sup>-/-</sup> hearts, we analyzed the expression of other collagen and fibronectin genes. A decrease in expression of *fn1a*, *fn1b*, *coll1a1a*, *col2a1a*, *coll10a1a* and *coll15a1b* was observed in *ccn2a*<sup>-/-</sup> hearts relative to wild type

(Fig. 6C), whereas the expression of other collagens, i.e. *coll1a2* or *coll11a1a*, remained unchanged (Fig. 6C).

Corroborating the RNA expression data, protein localization of fibronectin and Col2a1a was also affected in injured *ccn2a*<sup>-/-</sup> ventricles (Fig. 6D-H). In wild-type hearts, fibronectin accumulated in the damaged cardiac tissue and bulbus arteriosus (BA) (Fig. 6D). In *ccn2a*<sup>-/-</sup> hearts, fibronectin expression was substantially reduced in the injured ventricle, with BA-localized expression unaffected (Fig. 6D,E,G). Similarly, Col2a1a expression was also reduced in the damaged *ccn2a*<sup>-/-</sup> cardiac tissue (Fig. 6F,H).

To further test whether these target genes are regulated by Ccn2a, we examined their expression levels upon ectopic expression of *ccn2a* during cardiac regeneration. Heat-shock treatments (Fig. 6I) resulted in an approximately two-fold increase in *ccn2a* expression in *hsp70:ctgfa* hearts relative to wild-type hearts (Fig. 6J). Supporting the loss-of-function data, expression of genes such as *fn1a*, *fn1b*, *coll1a1a*, *col2a1a* and *coll10a1a* were significantly increased upon overexpression of *ccn2a* in wild-type injured hearts (Fig. 6J). Moreover, *cxc3.1*, the expression of which was increased in injured *ccn2a*<sup>-/-</sup> hearts, decreased upon *ccn2a* overexpression in wild-type injured hearts (Fig. 6J).

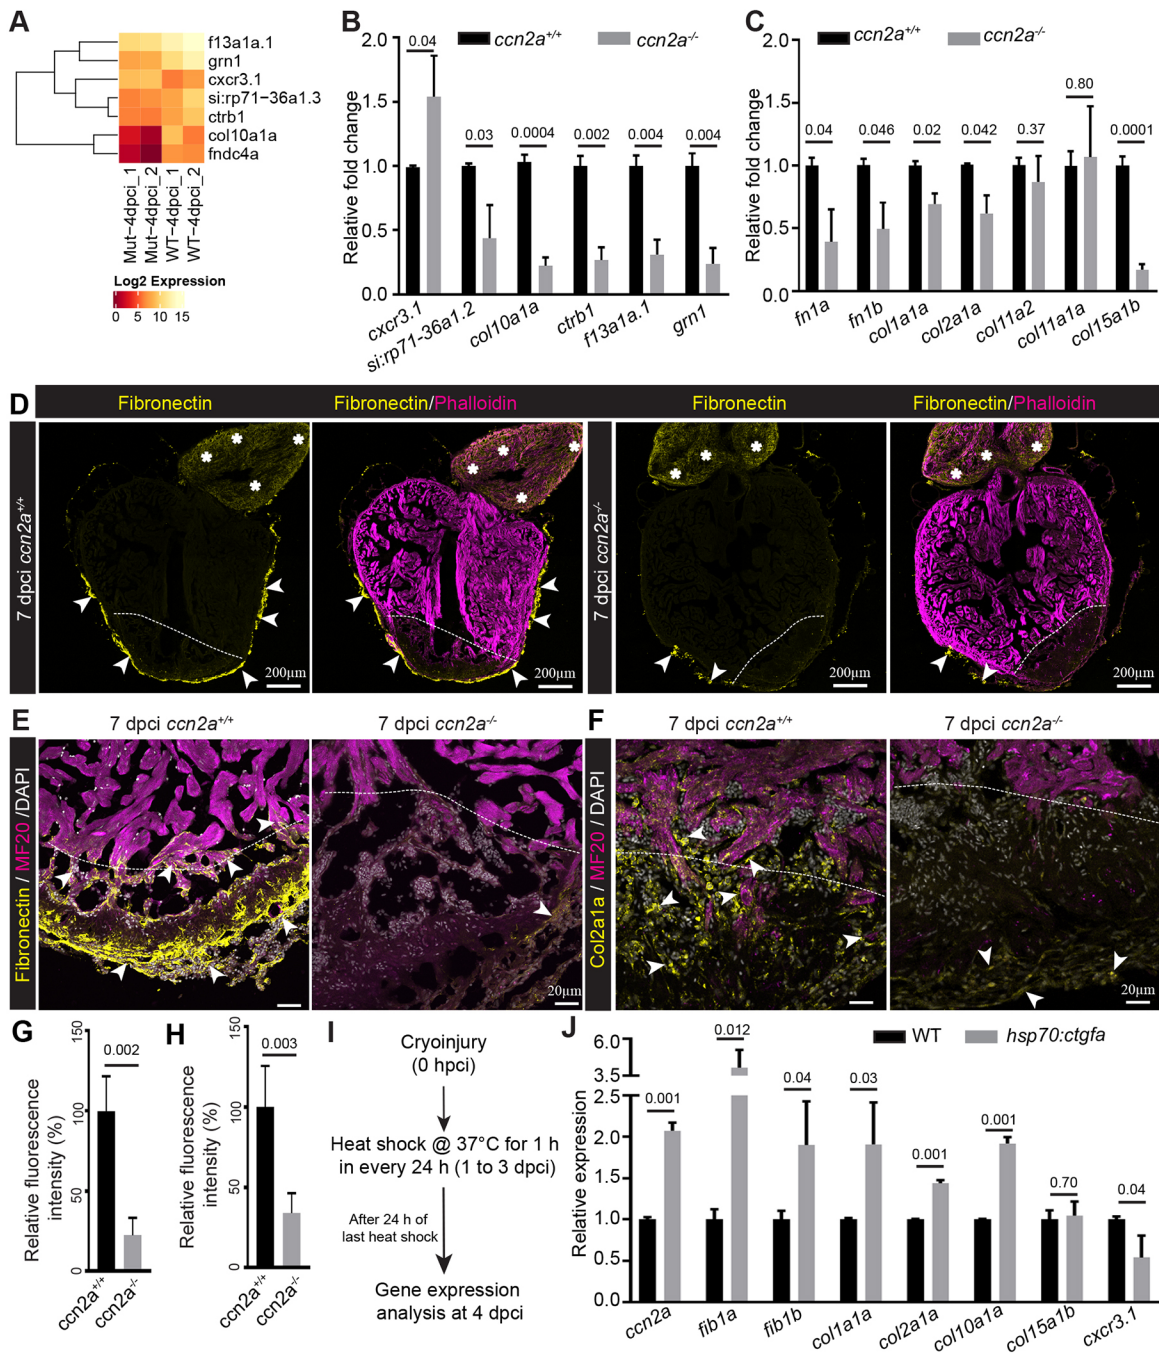

**Fig. 6. Ccn2a regulates secreted protein gene expression in injured heart.** (A) Heat map with color key showing changes in gene expression between *ccn2a* mutant (Mut) and wild-type (WT) hearts at 4 dpci based on RNA-sequencing analysis. (B) qPCR analysis to validate the RNA sequencing data (A) at 4 dpci ( $n=3$ , each sample is a pool of 6 hearts). (C) Quantification of fibronectin and collagen gene expression at 4 dpci ( $n=3$ , each sample is a pool of 6 hearts). (D) Sagittal cryosections of 7 dpci heart immunostained for fibronectin (yellow) and stained for F-actin (phalloidin; marks all cells). Arrows and asterisks indicate fibronectin localization in the ventricle and bulbus arteriosus, respectively. (E) Fibronectin and MF20 immunohistochemical staining of ventricular sagittal cryosection of 7 dpci heart. Arrowheads indicate fibronectin localization in the injured tissue. (F) Col2a1a and MF20 immunohistochemical staining of a ventricular sagittal cryosection of 7 dpci heart. Arrowheads indicate Col2a1a localization in the injured tissue. Dotted lines mark the injury border. (G,H) Quantification of the percent relative fluorescence intensity of fibronectin (G) and Col2a1a (H) in wild-type and *ccn2a<sup>-/-</sup>* heart sections ( $n=4$ ). The heart section from each heart showing the highest fluorescence intensity for fibronectin or Col2a1a was considered for analysis, and the mean of the wild-type control value was set to 100%. (I) Schematic of the experimental protocol used to measure gene expression post-cryo-injury in wild-type and *hsp70:ctgfa* transgenic animals. After cryoinjury, animals were subjected to daily 1 h heat shocks for 3 days. RNA was isolated 24 h after the last heat shock. (J) Quantitative analysis of the expression of *fib1a*, *fib1b*, *col1a1a*, *col2a1a*, *col10*, *col15a1b* and *cxcr3.1* in injured wild-type and *ccn2a* overexpressing (*hsp70:ctgfa*) hearts at 4 dpci ( $n=3$ , each sample represents a pool of six hearts). Data are mean  $\pm$  s.d. Values in B, C and J are normalized to the mean of the control. The statistical significance of differences was evaluated using a two-tailed Student's *t*-test (GraphPad Prism). The thickness of each maximum projection is 10-12  $\mu$ m. Mean Ct values for this figure are provided in Table S4.

During heart regeneration, fibronectin is predominantly synthesized by epicardial cells, which migrate to cover the wound after injury (Wang et al., 2013). Because fibronectin expression is

reduced in injured *ccn2a<sup>-/-</sup>* hearts, and Ccn2a is necessary for CM infiltration into the wound, we examined whether epicardial cell migration is also Ccn2a dependent. We performed immunostaining



on sagittal ventricular sections for Cav1, an epicardial marker (Cao et al., 2016). However, no evidence of epicardial migration defects was observed in *ccn2a*<sup>-/-</sup> (Fig. S8). Taken together, our experiments suggest that Ccn2a negatively regulates the chemokine receptor gene *cxc3.1* and positively regulates the expression of the ECM genes *fn1a*, *fn1b*, *coll1a1a*, *col2a1a*, *coll10a1a* and *coll15a1b* without affecting *coll1a2* or *coll1a1a* expression, or epicardial cell migration into the injured cardiac tissue.

### Ccn2a positively regulates nuclear pSmad3 localization in injured hearts

Next, we sought to understand how Ccn2a regulates ECM or *cxc3.1* chemokine receptor gene expression in damaged heart muscle. It has been described that CCN2 regulates TGFβ1-induced expression of fibronectin in Graves' orbital fibroblasts (Tsai et al., 2018). Another *in vitro* study reported a direct role for TGFβ signaling in the regulation of fibronectin and collagen expression (Ignatz and Massague, 1986), which we find are also regulated by Ccn2a in regenerating hearts. Thus, we investigated whether Ccn2a modulates Tgfβ signaling in injured cardiac tissue by analyzing the levels of phosphorylated nuclear-translocated Smad3, a transducer of the Tgfβ signal. Histological analysis showed that, in injured tissue, pSmad3-positive CM, endocardial cells and other cell nuclei are reduced by ~69%, 71% and 62%, respectively, in *ccn2a*<sup>-/-</sup> hearts relative to wild-type hearts (Fig. 7A,B). Moreover, statistical analysis indicated a trend toward a decreasing number of nuclear pSmad3-positive cells in injured *ccn2a* heterozygous hearts compared with wild-type controls (Fig. 7C). Corroborating the histological data, expression of *serpine1* and *mixl1*, which are reported to be direct Smad3 target genes (Mizutani et al., 2011; Xi et al., 2011; Zhang et al., 2011), was decreased by ~50% in *ccn2a*<sup>-/-</sup> hearts relative to wild-type hearts at 4 dpci (Fig. 7D). Supporting the loss-of-function data, the nuclear pSmad3 level was significantly increased and expression of *serpine1* and *mixl1*, was increased by ~8- and 1.6-fold, respectively, upon *ccn2a* overexpression at 4 dpci (Fig. 7E-G), suggesting that Ccn2a regulates Tgfβ/pSmad3 signaling cascade in injured heart tissue. Next, we investigated whether Ccn2a-mediated activation of nuclear pSmad3 localization acts through the Tgfβ/pSmad3 pathway. We found that pharmacological inhibition of Tgfβ signaling cascade suppresses the Ccn2a gain-of-function-mediated activation of pSmad3 nuclear localization (Fig. 7H-J), consistent with a mechanism in which Ccn2a positively regulates nuclear pSmad3 localization through the Tgfβ/pSmad3 signaling cascade.

To test the level of Tgfβ ligands, we performed immunohistochemistry to detect Tgfβ1, one of the known ligands of this pathway. The data revealed a ~60% reduction in Tgfβ1 expression in *ccn2a*<sup>-/-</sup> hearts relative to wild type (Fig. 8A,B), suggesting that Ccn2a positively regulates the level of Tgfβ1. To understand whether Ccn2a regulates Tgfβ ligand expression at the transcriptional level, we performed qPCR analysis and found that Ccn2a does not regulate the expression of *tgfb1*, *tgfb2* and *tgfb3*, as their transcript levels remain indistinguishable between *ccn2a*<sup>+/+</sup> and *ccn2a*<sup>-/-</sup> hearts (Fig. S9A). Their expression was also indistinguishable between injured wild-type and *ccn2a*-overexpressing hearts (Fig. S9B). This result suggests Ccn2a regulates Tgfβ/pSmad3 signaling likely by modulating stability or bioavailability of Tgfβ ligand in regenerating heart.

### Ccn2a regulates ECM gene expression and CM infiltration through Tgfβ/pSmad3 signaling in injured hearts

Our results implicated Ccn2a in mediating the downregulation of *fn1a*, *fn1b*, *coll1a1a*, *col2a1a*, *coll10a1a* and *coll15a1b*, and

upregulation of *cxc3.1*. To test whether this regulation is dependent on the Tgfβ pathway, we used the pharmacological inhibitor SB431542 to disrupt Tgfβ signaling from 1 to 4 dpci (Fig. 8C). We found a significant decrease in expression of *fn1a*, *fn1b*, *coll1a1a*, *col2a1a*, *coll10a1a* and *coll15a1b* (Fig. 8D). Additionally, *cxc3.1* expression increased approximately fourfold upon inhibition of the Tgfβ pathway, as also observed in *ccn2a*<sup>-/-</sup> animals (Fig. 8D). However, the expression of *coll1a1a* or *coll1a2*, genes that were unaltered in *ccn2a*<sup>-/-</sup> injured hearts, was decreased upon Tgfβ signaling inhibition (Fig. 8E).

Next, we explored whether global pharmacological perturbation of Tgfβ signaling had an impact on the Tgfβ-mediated functions in other tissues. We analyzed the expression of *coll1a1a*, *coll1a1*, *coll15a1b*, *fn1b* and *fn1b* in non-cardiac tissues upon pharmacological inhibition of Tgfβ pathway by SB431542. Decreased expression of *coll1a1* and *coll1a1a* was observed in the healthy vertebral tissue and eyes, respectively, upon inhibition of the Tgfβ pathway (Fig. S10). However, the expression of other collagen and fibronectin genes remained unaltered in these tissues. Moreover, in the brain, inhibition of Tgfβ pathway had no detectable effect on the expression of these genes (Fig. S10). Taken together, these results indicate that pharmacological inhibition of the Tgfβ pathway has context-specific targets.

Tgfβ signaling is essential for CM proliferation during zebrafish heart regeneration (Chablais and Jazwinska, 2012). To investigate whether the deficiency in CM repopulation of the injured heart tissue in *ccn2a*<sup>-/-</sup> animals was due to the suppression of the Tgfβ pathway, we assessed the effects of pharmacological Tgfβ inhibition (Fig. 8F). SB431542-mediated inhibition of the Tgfβ pathway from 1 to 7 dpci resulted in diminished CM repopulation of the injured tissue at 7 dpci (Fig. 8G,H). The observation that nuclear pSmad3 levels were reduced in injured *ccn2a* mutant hearts, and increased upon transgenic ectopic overexpression of Ccn2a in injured hearts, suggests that Tgfβ/pSmad3 signaling is likely to function downstream of Ccn2a.

## DISCUSSION

Based on our findings, we propose the following model. Upon injury, Ccn2a is synthesized and secreted into the ECM from endocardial cells of the wound. Here, it functions to modulate Tgfβ/pSmad3 signaling to promote CM proliferation and infiltration, and expression of pro-regenerative ECM genes. The regulation of Tgfβ signaling by Ccn2a could be either direct, through interaction with the Tgfβ ligands, or indirect, by influencing the mechanical properties of the ECM (Fig. 8I).

It is interesting to note that the role of Ccn2a in CM proliferation is mode-of-injury dependent. One of the crucial differences between the cryoinjury and resection models is the amount of fibrotic tissue produced. After cryoinjury, massive transient collagen appears in place of the dead tissue mass (González-Rosa et al., 2011); in contrast, in resection-injured hearts, a smaller amount of collagen localizes mostly superficially on the cut surface of the ventricle (Poss et al., 2002). Thus, the influence of Ccn2a on CM proliferation may be dependent on the amount or composition of collagen. This finding also points to the possibility that although both cardiac injury models are well established and many cellular and molecular responses are shared, fine-tuning of the signaling cascades involved in these heart regeneration models may differ. Further exploration of these differences would be helpful to gain insights into the mode of repair.

Genetic analysis indicated that Ccn2a positively regulates nuclear pSmad3 localization and ECM genes such as fibronectin and

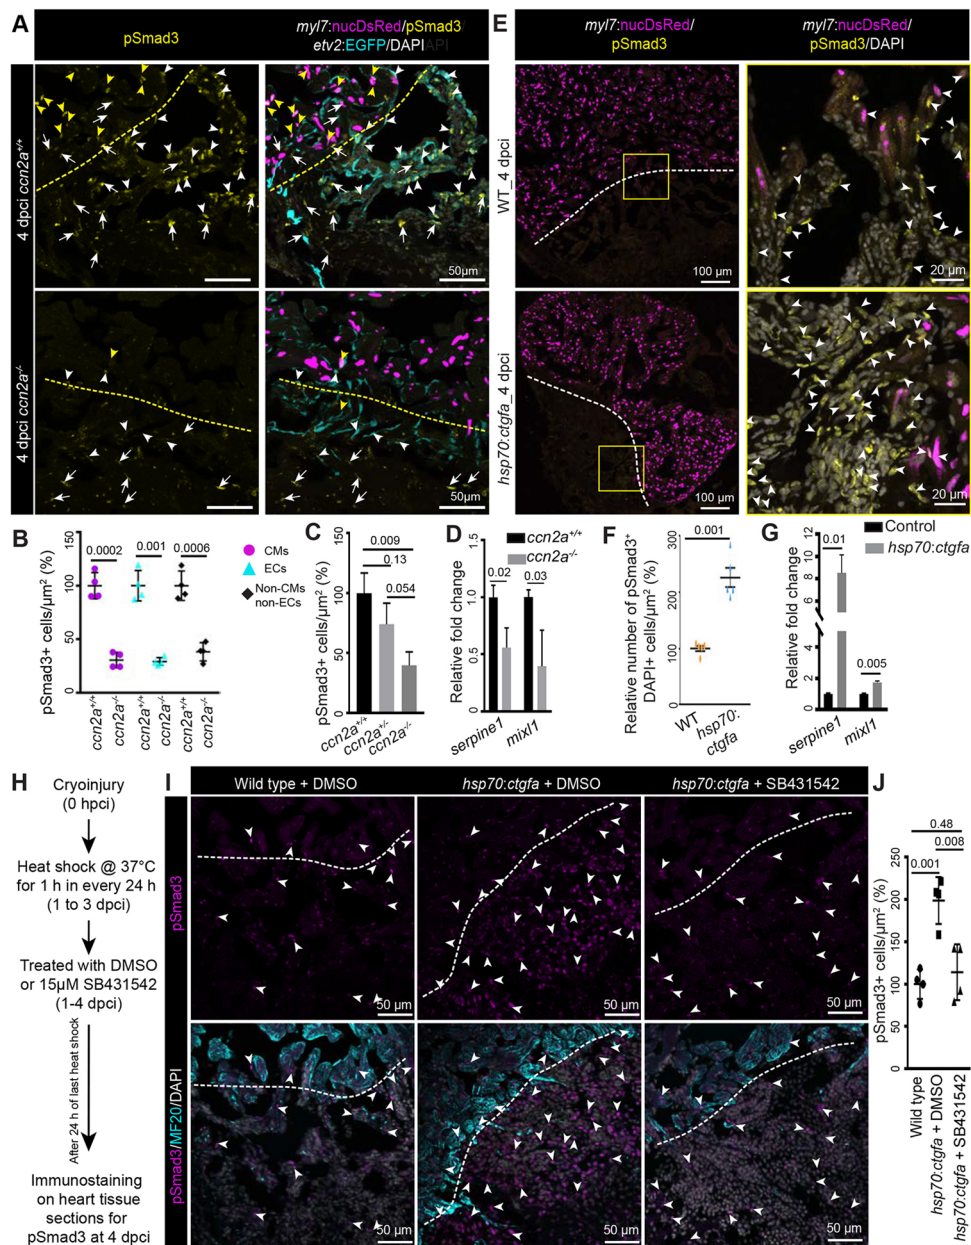

**Fig. 7. Ccn2a levels positively modulate nuclear pSmad3 localization in injured hearts.** (A) Maximum intensity projections of confocal images of sagittal cryosections of 4 dpci hearts expressing DsRed in CM nuclei (magenta) and EGFP in endocardial/endothelial cells (cyan), immunostained for pSmad3 (yellow) and stained with DAPI (white; marks all nuclei). Yellow and white arrowheads indicate DsRed<sup>+</sup>pSmad3<sup>+</sup> and EGFP<sup>+</sup>pSmad3<sup>+</sup> cells, respectively. White arrows indicate cells that are DAPI<sup>+</sup>pSmad3<sup>+</sup> but DsRed<sup>-</sup> and EGFP<sup>-</sup>. Dotted lines indicate the wound edge. (B) Percentage of Tgfb activity quantified in *ccn2a*<sup>+/+</sup> and *ccn2a*<sup>-/-</sup> hearts (n=4). The graph represents the ratio of nuclear DsRed<sup>+</sup>pSmad3<sup>+</sup> CMs to the total number of nuclear DsRed<sup>+</sup> CMs in the border zone (CMs); the ratio of EGFP<sup>+</sup>pSmad3<sup>+</sup> cells to the total number of EGFP<sup>+</sup> endocardial/endothelial cells in the injured tissue (ECs); and the ratio of pSmad3<sup>+</sup>DAPI<sup>+</sup> cells to the total number of EGFP<sup>-</sup> and DsRed<sup>-</sup> cells per unit area in the injured tissue (non-CMs and non-ECs). The mean wild-type control value was set to 100%. Quantifications were performed on two sagittal sections from each heart. (C) Percentage of Tgfb activity quantified in *ccn2a*<sup>+/+</sup>, *ccn2a*<sup>+/-</sup> and *ccn2a*<sup>-/-</sup> hearts at 4 dpci (n=3). The graph represents the ratio of pSmad3<sup>+</sup>DAPI<sup>+</sup> nuclei to the total number DAPI<sup>+</sup> nuclei in the injured tissue. The mean wild-type control value was set to 100%. Quantifications were performed on two sagittal sections from each heart. (D) qPCR analysis of *serpine1* and *mix11* expression at 4 dpci (n=3, each sample is a pool of six hearts). (E) Maximum intensity projection of confocal images of sagittal cryosection through 4 dpci wild-type and *ccn2a*-overexpressing (*hsp70:ctgfa*) heart expressing DsRed in CM nuclei (magenta), immunostained for pSmad3 (yellow) and stained with DAPI (white; marks all nuclei). Arrowheads indicate pSmad3<sup>+</sup>/DAPI<sup>+</sup> cells. Dotted lines indicate the wound edge. (F) Nuclear pSmad3<sup>+</sup> cells in the injured tissue quantified in wild-type and *ccn2a*-overexpressing (*hsp70:ctgfa*) heart (n=5 each). Two sagittal heart sections from each heart were considered for quantification. The mean wild-type control value was set to 100%. (G) qPCR analysis of *serpine1* and *mix11* expression at 4 dpci (n=3, each sample is a pool of four hearts). (H) Schematic of the experimental procedures used in I and J. (I) Maximum intensity projection of optical sections of sagittal cryosections through 4 dpci wild-type heart and DMSO or SB431542 treated *ccn2a*-overexpressing (*hsp70:ctgfa*) heart, immunostained for pSmad3 (magenta) and with MF20 (cyan), and stained with DAPI (white; marks all nuclei). Arrowheads indicate pSmad3<sup>+</sup>/DAPI<sup>+</sup> cells. Dotted lines indicate the wound edge. (J) Percentage of Tgfb activity quantified in wild-type, and in DMSO or SB431542-treated *ccn2a*-overexpressing hearts at 4 dpci (n=4). The graph represents the ratio of pSmad3<sup>+</sup>DAPI<sup>+</sup> nuclei to the total number DAPI<sup>+</sup> nuclei in the injured tissue. The mean wild-type control value was set to 100%. Quantifications were performed on two sagittal sections from each heart. Data are mean±s.d. A two-tailed Student's *t*-test was used to evaluate the statistical significance of the differences (GraphPad Prism). Thickness of the each maximum projection is 10–12 μm. Mean Ct values are provided in Table S4.



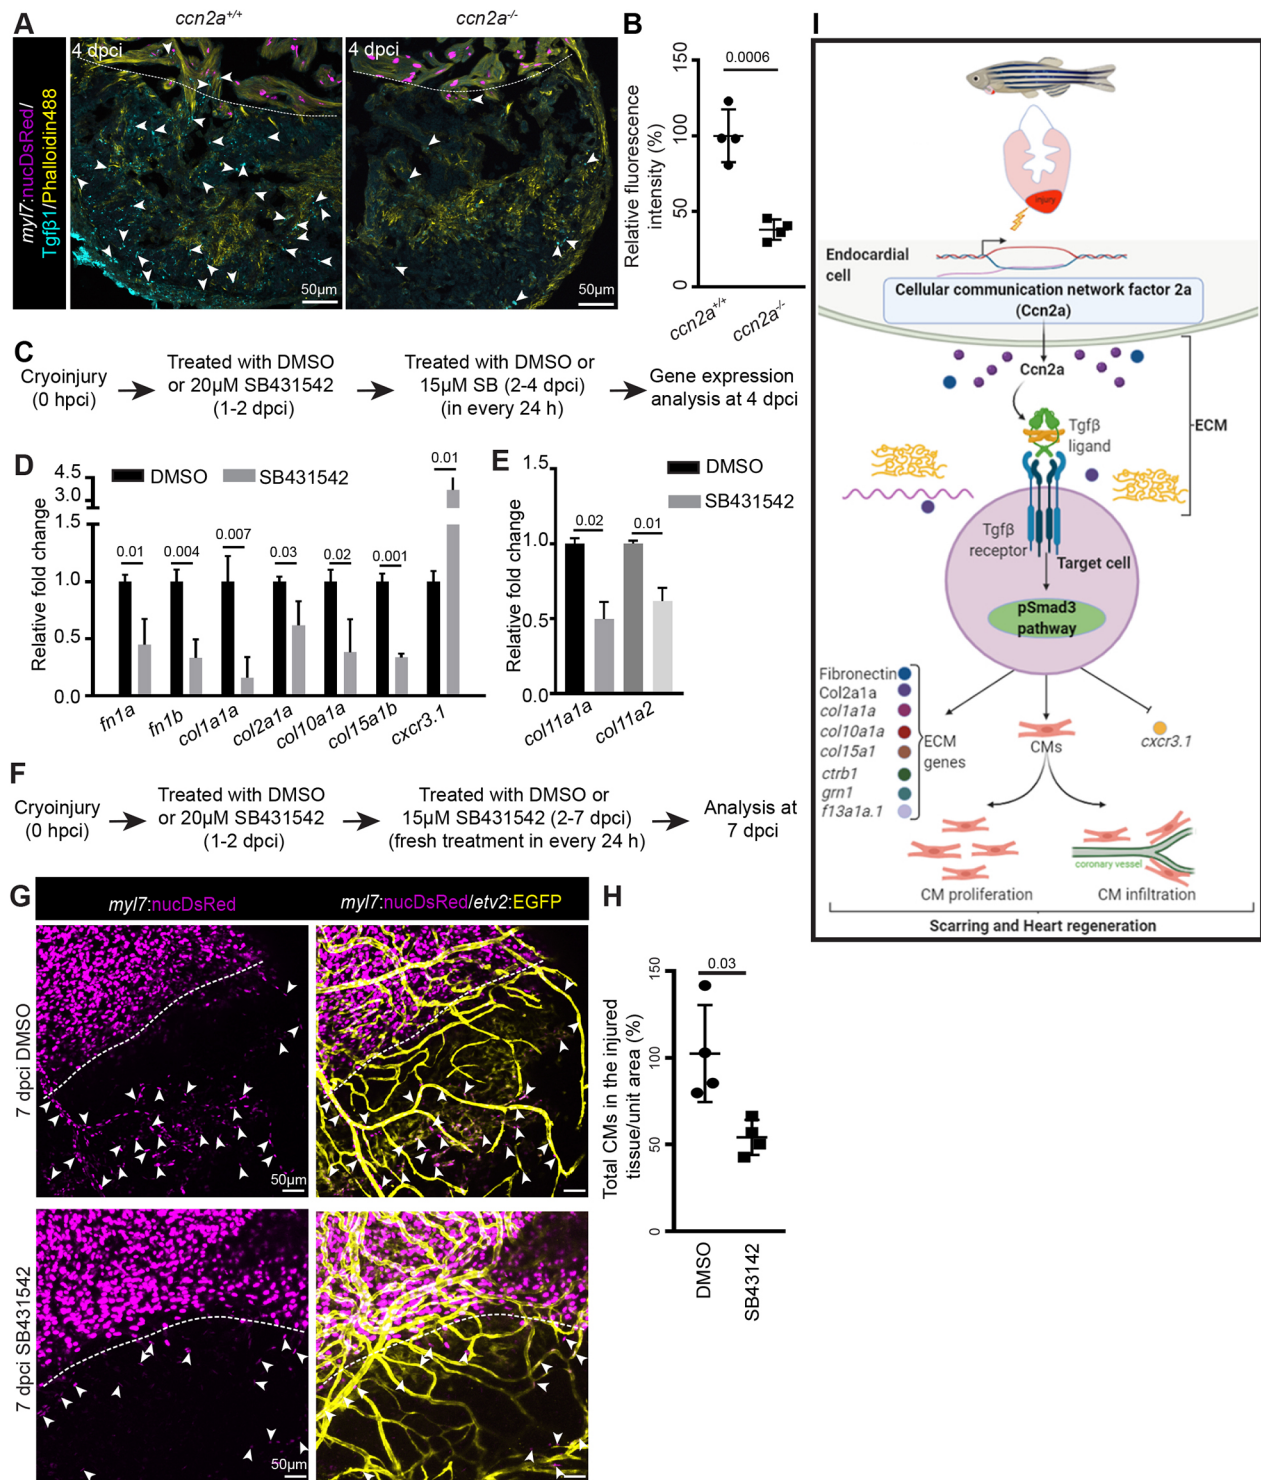

**Fig. 8. Decreased Tgfβ1 expression is observed in injured *ccn2a* mutant heart and Tgfβ/pSmad3 inhibition recapitulates the genetic regulation by *ccn2a* in injured heart.** (A) Maximum intensity projection of confocal images of 10 μm sagittal cryosection of wild-type and *ccn2a*<sup>-/-</sup> heart at 4 dpci, expressing DsRed in CM nuclei (magenta), immunostained for Tgfβ1 (cyan) and stained for F-actin (yellow; marks all cells). Arrowheads indicate Tgfβ1 expression. Dotted lines mark the injury edge. (B) Percentage of relative fluorescence intensity of Tgfβ1 ( $n=4$  each). The heart section from each heart showing the highest fluorescence intensity for Tgfβ1 was considered for quantification, and the mean of the wild-type control value was set to 100%. (C) Schematic of the experimental procedures used in D,E. (D,E) qPCR-based quantification of gene expression from DMSO- or SB431542 (TGFβ type I receptor inhibitor)-treated animals at 4 dpci ( $n=3$ , each sample is a pool of six hearts). The mean value of the DMSO-treated control for each gene was set to 1. (F) Schematic of the experimental procedures used in G,H. (G) Maximum intensity projections of confocal images of 7 dpci whole-mount heart expressing DsRed in CM nuclei and EGFP in endothelial/endocardial cells. Arrowheads indicate infiltrated CMs in the injured tissue. Dotted lines indicate the injury edge. (H) Analysis of infiltrated CMs in injured cardiac tissue quantified four DMSO-treated and four SB431542-treated wild-type animals from two independent experiments. The mean of the DMSO-treated control value was set to 100%. Data are mean±s.d. (I) Model of the regulatory role of Ccn2a in heart regeneration. CM, cardiomyocyte; ECM, extracellular matrix. The statistical significance of differences was evaluated by a two-tailed Student's *t*-test (GraphPad Prism). Mean Ct values are provided in Table S4.

collagen gene expression, and negatively regulates chemokine receptor *cxc3.1* expression, during heart regeneration. It is known that some collagens and fibronectin are downstream targets of the TGF $\beta$ /pSmad3 pathway (Ignatz and Massague, 1986), and CCN2 regulates TGF $\beta$ 1-induced expression of fibronectin *in vitro* (Tsai et al., 2018). Chemical inhibition of Tgf $\beta$  pathway in wild-type animals shows that, although all the regulated genes in injured *ccn2a* mutant hearts are pSmad3 targets, some of the pSmad3 target ECM genes such as *coll1a2* and *coll1a1a* are not regulated by Ccn2a in injured hearts. This indicates that, in regenerating cardiac tissue, Ccn2a does not work through global activation of pSmad3 signaling. Heterogeneity in molecular signaling and behavior exists even within the same cell type, due to them being present in different microenvironments (desJardins-Park et al., 2018; Rognoni and Watt, 2018). Thus, regulation of Tgf $\beta$ /pSmad3 targets by Ccn2a may be dependent on the microenvironment of the target cells in the damaged cardiac tissue.

All TGF $\beta$  ligands are synthesized as inactive precursor molecules containing a propeptide region and secreted into the ECM as a large latent complex. Physical interactions between the latent TGF $\beta$  and ECM molecules are essential for the transformation into an active form of TGF $\beta$  ligand (Dabovic et al., 2002; Yoshinaga et al., 2008; Shi et al., 2011). Another study using human fibroblasts suggested that CCN2 regulates TGF $\beta$ -induced phosphorylation of Smad1 through the integrin  $\alpha_v\beta_3$  receptor (Nakerakanti et al., 2011). Our finding that Ccn2a positively regulates Tgf $\beta$ 1 localization in injured cardiac tissue without apparent effects on expression of its mRNA suggests a role for Ccn2a in regulating the processing or stability of Tgf $\beta$ 1. Abreu et al. (2002) reported that CCN2 can enhance TGF $\beta$ 1 binding to its receptor and signaling *in vitro*. In addition to the direct interaction of ECM molecules with latent TGF $\beta$ , the mechanical state of the ECM also regulates TGF $\beta$  activity (Wipff et al., 2007; Giacomini et al., 2012; Henderson et al., 2013). These pieces of evidence suggest that a plausible mechanism underlying the regulation of Tgf $\beta$ 1 processing or stability in injured zebrafish hearts could involve either a physical interaction of Ccn2a with latent Tgf $\beta$  or other complex mechanical properties of the wound, but these possibilities need to be further elucidated.

The immune response plays a crucial role in regeneration (Hui et al., 2017; Lai et al., 2017). In mammals, immune cells express CXCR3 and preferentially help in the migration of immune cells into inflamed tissue (Torraca et al., 2015). In teleosts, including zebrafish, there are two paralogs: *cxc3.1* and *cxc3.2*. Although the expression of *cxc3.1* and *cxc3.2* in relation to infection or inflammation in zebrafish has not been determined, in other teleosts, such as ayu (*Plecoglossus altivelis*), *cxc3.1*- and *cxc3.2*-positive macrophages exhibit M1 and M2 polarization, respectively, upon bacterial infection (Lu et al., 2017). M1 macrophages are pro-inflammatory; in contrast, M2 macrophages are associated with anti-inflammatory states (Liu et al., 2014). In *ccn2a* mutants and animals treated with chemical inhibitors of Tgf $\beta$  signaling, *cxc3.1* expression was increased in injured heart without affecting the expression of its paralog *cxc3.2* (data not shown), indicating that Ccn2a likely suppresses inflammatory signals by inhibiting M1 polarization of macrophages through pSmad3 signaling. In the future, it will be interesting to explore the functional role of *cxc3.1* in heart regeneration or fibrosis.

Taken together, our study highlights the importance of Ccn2a function in heart regeneration and shows that secreted signaling cues in early injury sites play an important role in determining the extent of scarring; specifically, whether a transient collagen can be efficiently replaced with functional tissue. Thus, it would be worth

exploring whether targeted manipulation of ECM production can serve as a strategy to induce mammalian heart regeneration and improve cardiac function.

## MATERIALS AND METHODS

### Zebrafish maintenance

Wild-type AB and transgenic *Tg(-5.1myl7:nDsRed2)j2* (Mably et al., 2003) [hereafter *Tg(my17:nucDsRed)*], *TgBAC(etv2:EGFP)ci1* (Proulx et al., 2010) [hereafter *Tg(etv2:EGFP)*], *Tg(kdr1:HRAS-mCherry)<sup>s896</sup>* (Chi et al., 2008) and *Tg(hsp70:ctgfa-FL-2a-EGFP)* (Mokalled et al., 2016) zebrafish were maintained in a state-of-the-art zebrafish aquarium as described previously (Kimmel et al., 1995). Four- to 10-month-old male and female animals of ~2.5 to 3 cm in length were used.

### Ethics statement

For zebrafish maintenance and experimentation, the guidelines recommended by the Committee for the Purpose of Control and Supervision of Experiments on Animals (CPCSEA), Government of India, were followed. The Institute Animal Ethics Committee (IAEC) approved the animal care procedures and protocols used in this study.

### qPCR and gene expression analysis

For qPCR analysis, total RNA was isolated from sham, cryoinjured cardiac ventricles and non-cardiac tissues (eyes, brain and vertebral tissue) at desired time points using an RNeasy Micro kit (Qiagen) according to the manufacturer's instructions. In brief, five hearts were pooled per biological replicate, and 1  $\mu$ g of total RNA was reverse transcribed into cDNA with a SuperScriptIII cDNA synthesis kit (Invitrogen). For *ccn2a* transcript stability analysis, total RNA was isolated from 48 hpf *ccn2a<sup>+/+</sup>*, *ccn2a<sup>+/-</sup>* and *ccn2a<sup>-/-</sup>* embryos using Trizol reagent (Invitrogen) according to the manufacturer's instructions. Forty embryos were pooled per biological replicate, and 2  $\mu$ g of total RNA was reverse transcribed into cDNA with MMLV reverse transcriptase (Invitrogen). The prepared cDNA was used to perform qPCR with a PCR Max Real-time PCR detection system (Cole Parmer). The primer sequences used in this study are provided in Table S3. mRNA expression levels relative to *ef1a* or *rpl13* expression levels were calculated using the  $\Delta$ Ct method. Mean Ct values are listed in Table S4.

### In situ hybridization

For RNA probe synthesis, a partial cDNA template of *ccn2a* or *ccn2b* was amplified from an embryonic cDNA library using primers shown in Table S1 and cloned into a pGEMT easy vector. Digoxigenin (DIG)-labeled *ccn2a* and *ccn2b* riboprobes were synthesized using linearized vectors and SP6 and T7 RNA polymerase, respectively.

For *in situ* hybridization on sections, tissue samples were processed for wax sectioning and *in situ* hybridization was performed as previously described (Lepilina et al., 2006). Briefly, 15  $\mu$ m zebrafish heart tissue sections were rehydrated, permeabilized, washed in acid, blocked and hybridized with a DIG-labeled riboprobe (500 ng/ml in hybridization buffer) at 65°C overnight. Subsequently, the tissue sections were incubated with an alkaline phosphatase-conjugated anti-DIG antibody (Roche). Finally, after washing, the signal was detected with an NBT/BCIP staining solution (Roche), and the sections were mounted in Kaiser's glycerol gelatin (Merck) for imaging.

### Generation of a BAC recombineering-based

#### *TgBAC(ccn2a:EGFP) line*

Using the UCSC genome browser (Zv6 assembly, <https://genome-euro.ucsc.edu>), a BAC clone encompassing both the upstream and downstream sequences around the ATG start site of *ccn2a* was identified. BAC clone CH211-156124 (ID: 23907380), which covers ~53 kb of regulatory sequences upstream from the start ATG and ~55 kb downstream from the last exon of *ccn2a*, was purchased from the BACPAC Resources Center, Children's Hospital Oakland (<https://bacpacresources.org/>). BAC recombineering was performed as described previously (Bussmann and Schulte-Merker, 2011). Briefly, in the first step, the BAC clone was



transformed with the pRedET plasmid (Gene Bridges), which enabled arabinose-inducible homologous recombination. In the next step, PCR-amplified Tol2 arms in opposing directions flanking an ampicillin resistance cassette were inserted into the BAC backbone. Finally, a combination of EGFP and a kanamycin-resistance cassette was inserted at the start ATG of *ccn2a*. The final BAC DNA was purified using a NucleoBond Xtra BAC kit (Machery Nagel), and correct insertion of the EGFP-kanamycin-resistance cassette was verified by sequencing. In total, 10–15 µg of BAC DNA was co-injected with 50 µg of *Tol2* transposase mRNA into a one-cell wild-type embryo. Founders were outcrossed, and two F1 animals were isolated and maintained. Outcrossing of both GFP-positive F1 transgenic lines (and the following generations) revealed segregation of GFP expression at Mendelian ratios, suggesting that each line carried a single insertion. The reporter line was named *TgBAC(ccn2a:EGFP)<sup>pp01</sup>*. Hemizygous *TgBAC(ccn2a:EGFP)* animals were analyzed in this study.

### Cryo-injury and heat-shock experiments

Cardiac ventricular cryoinjuries were made as described previously (González-Rosa and Mercader, 2012). In summary, animals were anesthetized by immersion in 0.02% tricaine and immobilized into a wet foam holder. The heart ventricle was exposed by making a small thoracic incision and gently squeezing the abdomen. To injure the heart, a 0.4 mm diameter copper filament linked to a polypropylene insulation tube was cooled by dipping in liquid nitrogen and placed on the ventricular apex until thawing was observed (a few seconds). After the operation, the fish were transferred to a tank with fresh system water and, after recovery, the fish were placed in the aquarium. For heat-shock experiments, wild-type (as control) and clutch mate *Tg(hsp70:ctgfa:2a:EGFP)* fish received heat shock by incubation in preheated system water at 37°C for 1 h (maximum six fish per liter) in 24 h intervals for the desired period.

### Coronary growth and CM infiltration in a damaged tissue assay

Cryo-injury or amputated *Tg(etv2:EGFP):Tg(myf7:nucDsRed)* animals were kept in the aquarium until 4, 7 or 12 dpci or dpa. For whole-mount analysis, freshly isolated hearts collected at the desired time points were immediately embedded in 1% low-melting point agarose/1×PBS containing 0.001% tricaine in a glass-bottomed dish. Confocal sections were imaged with a Leica SP8 confocal microscope and processed to obtain maximal intensity projections. DsRed<sup>+</sup> nuclei in the injured/scar tissue were considered infiltrated CMs.

Sagittal cryosections (10 µm) through *Tg(myf7:nucDsRed)<sup>+</sup>* hearts were stained with Alexa-488-conjugated phalloidin and 4',6'-diamidino-2-phenylindole (DAPI) to study CM infiltration into the damaged tissue in histological sections. Confocal sections were imaged with a Leica SP8 confocal microscope and processed to obtain maximal intensity projection.

### EdU incorporation assay

For EdU incorporation analysis, injured fish were anesthetized with 0.02% tricaine, and 10 µl of 10 mM EdU (Click-iT EdU, Invitrogen) was injected intraperitoneally into each fish at 24 h before heart isolation. Harvested hearts were fixed in 4% PFA for 20 min at room temperature and processed for whole-mount EdU labeling or cryosectioning. EdU labeling was performed on the whole-mount hearts or cardiac tissue sections according to the manufacturer's instructions. For co-immunostaining with EdU detection, immunostaining was performed before EdU staining. DAPI (0.5 mg/ml water, Sigma) was used to detect DNA. For imaging, the whole-mount stained hearts were embedded in 1% low-melting point agarose in a glass-bottomed dish. Optical sections were captured using a Leica SP8 confocal microscope and quantified using LAS X software.

### Histological and immunohistochemical analyses

Cardiac tissue was embedded in paraffin following standard protocols, and sagittal sections of the heart were prepared using a microtome (Bright Instruments). For histological analysis, acid fuchsin-orange G (AFOG) staining was performed using an AFOG staining kit (BioGnost) following the manufacturer's instructions. The slides were mounted with Entellan (Merck) and bright-field images were captured using a Leica stereoscope.

The degree of heart regeneration was analyzed based on the presence of collagenous scar on the 60 dpci or 150 dpci heart tissue sections. For each heart, the section showing the highest area covered by scar tissue was considered for analysis. If the highest area covered by the collagenous scar without any visible invading muscle on the tissue section was <2000 µm<sup>2</sup>, then that heart was considered as 'vigorously regenerating' and if the scar area was >15,000 µm<sup>2</sup>, then that heart was considered as 'poorly regenerating' or having a persistent collagenous scar at that time point. To group the hearts based on degree of regeneration, we considered complete regeneration when highest scar area was <2000 µm<sup>2</sup>, moderate regeneration when highest scar area was in between 2000 and 15,000 µm<sup>2</sup>, and very poor regeneration when highest scar area was >15,000 µm<sup>2</sup>.

For immunohistochemical analysis, cardiac tissue was embedded in tissue-freezing medium following standard protocols, and the heart was sagittally sectioned (10 µm, cryotome, Leica). Immunohistochemical analysis was performed on the tissue sections as described previously (Patra et al., 2017). Briefly, PBS-washed tissue sections were re-fixed, permeabilized, blocked and incubated with primary antibodies [mouse MF20, 1:40 (DSHB); rabbit anti-GFP, 1:400 (Novus Biologicals, NB600-308); rabbit anti-TGFβ1, 1:100 (Cloud-Clone, PAA124Mu01); rabbit anti-tropomyosin, 1:50 (Cloud-Clone, PAD449Mu01); rabbit anti-pSMAD3, 1:200 (Abcam, ab52903); rabbit anti-fibronectin, 1:200 (Sigma, F3648); and rabbit anti-Col2a1a, 1:100 (Genetex, GTX127988)] overnight at 4°C after blocking for 1 h in a blocking solution [5% goat serum (MP Biomedicals)/0.2% Tween 20/PBS]. Primary immune complexes were detected by AlexaFluor488-, AlexaFluor 555- or AlexaFluor 647-conjugated antibodies (1:400; Molecular Probes, A11034, A21428 and A21244). DAPI (0.5 mg/ml water, Sigma) was used to detect DNA. Optical sections were captured using a Leica SP8 or Zeiss LSM 710 confocal microscope.

### RNA-sequencing

RNA was isolated from 4 dpci wild-type and *ccn2a* mutant cardiac ventricles (bulbus arteriosus and atrium were dissected out from each heart) using a RNeasy micro Kit (Qiagen). Five cardiac ventricles were pooled per biological replicate and two samples each from wild-type and *ccn2a<sup>-/-</sup>* animals were analyzed. To avoid genomic DNA contamination, samples were treated by on-column DNase digestion (DNase-Free DNase Set, Qiagen) during isolation. Total RNA and library integrity were verified with a LabChip Gx Touch 24 (Perkin Elmer) instrument. 2.2 µg of total RNA was used as input for Truseq Stranded mRNA Library preparation following the low sample protocol (Illumina). Sequencing was performed with the NextSeq500 instrument (Illumina) using v2 chemistry, resulting in an average of 23 M reads per library with 1×75 bp single end setup. The raw reads were assessed for quality, adapter content and duplication rates with FastQC. To trim reads after a quality drop below a mean of Q20 in a window of 10 nucleotides, Reaper version 13-100 was employed (Davis et al., 2013). Reads between 30 and 150 nucleotides were selected for further analyses. Selected reads were aligned versus the Ensembl Zebrafish genome version DanRer10 (GRCz10.87) using STAR 2.4.0a with the parameter '-outFilterMismatchNoverLmax 0.1' to increase the maximum ratio of mismatches to mapped length to 10% (Dobin et al., 2013). The FeatureCounts 1.4.5-p1 tool from the Subread package was used to count the number of reads aligning to genes (Liao et al., 2014). Only reads mapping at least partially inside exons were admitted and aggregated per gene. Reads overlapping multiple genes or aligning to multiple regions were excluded. Differentially expressed genes were identified using DESeq2 version 1.62 (Love et al., 2014). Only genes with a minimum fold change of ±1.5 (log<sub>2</sub>±0.59), a maximum Benjamini-Hochberg corrected *P*-value of 0.05 and a minimum combined mean of five reads was deemed to be significantly differentially expressed. The Ensembl annotation was enriched with UniProt data (release 06.06.2014) based on Ensembl gene identifiers.

### Drug treatment

The TGFβ type I receptor inhibitor SB431542 (Sigma) was dissolved in a stock concentration of 30mM in DMSO and used for treatment. Zebrafish were treated with a 20 µM or 15 µM SB431542 solution in system water

from 1 to 2 dpci and from 2 to q4 or 7 dpci, respectively. Control animals were kept in system water containing 63  $\mu$ l of DMSO/100 ml of system water. During the experiment, all animals were maintained at a density of four fish per 125 ml system water. At 4 or 7 dpci, animals were anesthetized, and hearts were isolated and processed for total RNA isolation and histology.

### Microscopy and quantification

For whole-mount bright-field and confocal microscopy, hearts were embedded in 1% low-melting-point agarose in PBS and imaged with a Leica SP8 or M205FA (Leica). Immunostained slides were imaged using a Leica SP8 confocal microscope. After imaging, the acquired confocal z-stacks were processed, and cell counting was performed with LASX (Leica) or ImageJ/Fiji software. Quantification of CM proliferation was performed in an area 100  $\mu$ m from the border zone. Bright-field images were obtained with stereomicroscopes (M205FA, Leica; Stereodiscovery V8, Zeiss). Quantifications of CM proliferation, appearance in the wound, and pSmad3<sup>+</sup> cells were performed using LAS X software. Fluorescence intensity analysis was performed using ImageJ/Fiji software. For fluorescence intensity measurement, images were converted to 8-bit and the scale was ensured to be equal for all images. Mean intensity and area was measured using the ROI manager tool in ImageJ/Fiji software. Degree of heart regeneration was considered based on the highest area covered by a collagenous scar on the heart section in each heart and a semi-quantitative scoring-based analysis was performed.

### Statistical analysis

Statistical differences in qPCR expression, CM tracking along new coronary vessels into the injured tissue, nuclear pSmad3 quantification, and fibronectin, Col2a1a and Tgf $\beta$ 1 immunofluorescent intensity were analyzed using a two-tailed Student's *t*-test. CM proliferation was analyzed using Mann-Whitney nonparametric tests. For scar analysis, statistical significance of differences was evaluated by a wound-recovery  $\chi^2$  test. In all analysis, changes were considered to be statistically significant when  $P < 0.05$ . Data were processed with the GraphPad Prism7 software. Values are represented as mean  $\pm$  s.d. or mean  $\pm$  s.e.m.

### Acknowledgements

C.P. is grateful to Dr Ratnaparkhi, and Dr M. Housley for revising the manuscript critically. We thank S. Bhujbal and M. Müller-Boche for excellent fish care at Agharkar Research Institute and the Max Planck Institute, respectively, and H. M. Maischein at the Max Planck Institute for microinjections.

### Competing interests

The authors declare no competing or financial interests.

### Author contributions

Conceptualization: D.M., C.P.; Methodology: D.M., G.W., K.D.P., D.Y.R.S., C.P.; Validation: D.M., G.W., A.R.; Formal analysis: D.M., G.W., M.H.M., Z.K., A.L.D., A.R., S.G.; Investigation: D.M., G.W., M.H.M., A.L.D., C.P.; Resources: K.D.P., C.P.; Data curation: D.M.; Writing - original draft: D.M., C.P.; Writing - review & editing: D.M., Z.K., K.D.P., D.Y.R.S., C.P.; Supervision: C.P.; Project administration: D.M., C.P.; Funding acquisition: K.D.P., C.P.

### Funding

This work was supported in part by the Max-Planck-Gesellschaft (to C.P. and D.Y.R.S.) and Department of Science and Technology India (Max-Planck-partner group award to C.P.), by an Agharkar Research Institute internal grant, and by the National Institutes of Health (R01 HL081674 and R01 HL131319 to K.D.P.). Deposited in PMC for release after 12 months.

### Data availability

RNA-seq data have been deposited in GEO under accession number GSE164491.

### Supplementary information

Supplementary information available online at <https://dev.biologists.org/lookup/doi/10.1242/dev.193219.supplemental>

### Peer review history

The peer review history is available online at <https://dev.biologists.org/lookup/doi/10.1242/dev.193219.reviewer-comments.pdf>

### References

- Abreu, J. G., Ketpura, N. I., Reversade, B. and De Robertis, E. M. (2002). Connective-tissue growth factor (CTGF) modulates cell signalling by BMP and TGF- $\beta$ . *Nat. Cell Biol.* **4**, 599-604. doi:10.1038/ncb826
- Accornero, F., van Berlo, J. H., Correll, R. N., Elrod, J. W., Sargent, M. A., York, A., Rabinowitz, J. E., Leask, A. and Molkentin, J. D. (2015). Genetic analysis of connective tissue growth factor as an effector of transforming growth factor  $\beta$  signaling and cardiac remodeling. *Mol. Cell. Biol.* **35**, 2154-2164. doi:10.1128/MCB.00199-15
- Angelini, A., Li, Z., Mericskay, M. and Decaux, J. F. (2015). Regulation of connective tissue growth factor and cardiac fibrosis by an SRF/MicroRNA-133a axis. *PLoS ONE* **10**, e0139858. doi:10.1371/journal.pone.0139858
- Bassat, E., Mutlak, Y. E., Genzelinakh, A., Shadrin, I. Y., Baruch Umansky, K., Yifa, O., Kain, D., Rajchman, D., Leach, J., Riabov Bassat, D. et al. (2017). The extracellular matrix protein agrin promotes heart regeneration in mice. *Nature* **547**, 179-184. doi:10.1038/nature22978
- Bergmann, O., Bhardwaj, R. D., Bernard, S., Zdunek, S., Barnabe-Heider, F., Walsh, S., Zupicich, J., Alkass, K., Buchholz, B. A., Druid, H. et al. (2009). Evidence for cardiomyocyte renewal in humans. *Science* **324**, 98-102. doi:10.1126/science.1164680
- Bussmann, J. and Schulte-Merker, S. (2011). Rapid BAC selection for tol2-mediated transgenesis in zebrafish. *Development* **138**, 4327-4332. doi:10.1242/dev.068080
- Cao, J., Navis, A., Cox, B. D., Dickson, A. L., Gemberling, M., Karra, R., Bagnat, M. and Poss, K. D. (2016). Single epicardial cell transcriptome sequencing identifies Caveolin 1 as an essential factor in zebrafish heart regeneration. *Development* **143**, 232-243. doi:10.1242/dev.130534
- Chablais, F. and Jazwinska, A. (2012). The regenerative capacity of the zebrafish heart is dependent on TGFbeta signaling. *Development* **139**, 1921-1930. doi:10.1242/dev.078543
- Chi, N. C., Shaw, R. M., De Val, S., Kang, G., Jan, L. Y., Black, B. L. and Stainier, D. Y. (2008). Foxn4 directly regulates tbx2b expression and atrioventricular canal formation. *Genes Dev.* **22**, 734-739. doi:10.1101/gad.1629408
- Dabovic, B., Chen, Y., Colarossi, C., Obata, H., Zambuto, L., Perle, M. A. and Rifkin, D. B. (2002). Bone abnormalities in latent TGF- $\beta$  binding protein (Ltbp)-3-null mice indicate a role for Ltbp-3 in modulating TGF- $\beta$  bioavailability. *J. Cell Biol.* **156**, 227-232. doi:10.1083/jcb.200111080
- Davis, M. P., van Dongen, S., Abreu-Goodger, C., Bartonicek, N. and Enright, A. J. (2013). Kraken: a set of tools for quality control and analysis of high-throughput sequence data. *Methods* **63**, 41-49. doi:10.1016/j.ymeth.2013.06.027
- Dean, R. G., Balding, L. C., Candido, R., Burns, W. C., Cao, Z., Twigg, S. M. and Burrell, L. M. (2005). Connective tissue growth factor and cardiac fibrosis after myocardial infarction. *J. Histochem. Cytochem.* **53**, 1245-1256. doi:10.1369/jhc.4A6560.2005
- desJardins-Park, H. E., Foster, D. S. and Longaker, M. T. (2018). 'Fibroblasts and wound healing: an update', *Regen. Med.* **13**: 491-495. doi:10.2217/rme-2018-0073
- Dobin, A., Davis, C. A., Schlesinger, F., Drenkow, J., Zaleski, C., Jha, S., Batut, P., Chaisson, M. and Gingeras, T. R. (2013). STAR: ultrafast universal RNA-seq aligner. *Bioinformatics* **29**, 15-21. doi:10.1093/bioinformatics/bts635
- Doppler, S. A., Deutsch, M. A., Serpooshan, V., Li, G., Dzilic, E., Lange, R., Krane, M. and Wu, S. M. (2017). Mammalian heart regeneration: the race to the finish line. *Circ. Res.* **120**, 630-632. doi:10.1161/CIRCRESAHA.116.310051
- Engel, F. B., Hsieh, P. C., Lee, R. T. and Keating, M. T. (2006). FGF1/p38 MAP kinase inhibitor therapy induces cardiomyocyte mitosis, reduces scarring, and rescues function after myocardial infarction. *Proc. Natl. Acad. Sci. USA* **103**, 15546-15551. doi:10.1073/pnas.0607382103
- Fang, L., Kahai, S., Yang, W., He, C., Seth, A., Peng, C. and Yang, B. B. (2010). Transforming growth factor-beta inhibits nephronectin-induced osteoblast differentiation. *FEBS Lett.* **584**, 2877-2882. doi:10.1016/j.febslet.2010.04.074
- Fogerty, F. J., Fessler, L. I., Bunch, T. A., Yaron, Y., Parker, C. G., Nelson, R. E., Brower, D. L., Gullberg, D. and Fessler, J. H. (1994). Tigger, a novel Drosophila extracellular matrix protein that functions as a ligand for Drosophila alpha PS2 beta PS integrins. *Development* **120**, 1747-1758.
- Giacomini, M. M., Travis, M. A., Kudo, M. and Sheppard, D. (2012). Epithelial cells utilize cortical actin/myosin to activate latent TGF-beta through integrin alpha(v)beta(6)-dependent physical force. *Exp. Cell Res.* **318**, 716-722. doi:10.1016/j.yexcr.2012.01.020
- González-Rosa, J. M. and Mercader, N. (2012). Cryoinjury as a myocardial infarction model for the study of cardiac regeneration in the zebrafish. *Nat. Protoc.* **7**, 782-788. doi:10.1038/nprot.2012.025
- González-Rosa, J. M., Martín, V., Peralta, M., Torres, M. and Mercader, N. (2011). Extensive scar formation and regression during heart regeneration after cryoinjury in zebrafish. *Development* **138**, 1663-1674. doi:10.1242/dev.060897
- Gravning, J., Ørn, S., Kaasbøll, O. J., Martinov, V. N., Manhenke, C., Dickstein, K., Edvardsen, T., Attramadal, H. and Ahmed, M. S. (2012). Myocardial connective tissue growth factor (CCN2/CTGF) attenuates left ventricular remodeling after myocardial infarction. *PLoS ONE* **7**, e52120. doi:10.1371/journal.pone.0052120



- Harrison, M. R. M., Bussmann, J., Huang, Y., Zhao, L., Osorio, A., Burns, C. G., Burns, C. E., Sucov, H. M., Siekmann, A. F. and Lien, C.-L. (2015). Chemokine-guided angiogenesis directs coronary vasculature formation in zebrafish. *Dev. Cell* **33**, 442-454. doi:10.1016/j.devcel.2015.04.001
- Henderson, N. C., Arnold, T. D., Katamura, Y., Giacomini, M. M., Rodriguez, J. D., McCarty, J. H., Pellicoro, A., Raschperger, E., Betsholtz, C., Ruminski, P. G. et al. (2013). Targeting of alphav integrin identifies a core molecular pathway that regulates fibrosis in several organs. *Nat. Med.* **19**, 1617-1624. doi:10.1038/nm.3282
- Hui, S. P., Sheng, D. Z., Sugimoto, K., Gonzalez-Rajal, A., Nakagawa, S., Hesselson, D. and Kikuchi, K. (2017). Zebrafish regulatory T cells mediate organ-specific regenerative programs. *Dev. Cell* **43**, 659-672.e5. doi:10.1016/j.devcel.2017.11.010
- Ignatz, R. A. and Massague, J. (1986). Transforming growth factor-beta stimulates the expression of fibronectin and collagen and their incorporation into the extracellular matrix. *J. Biol. Chem.* **261**, 4337-4345.
- Itou, J., Oishi, I., Kawakami, H., Glass, T. J., Richter, J., Johnson, A., Lund, T. C. and Kawakami, Y. (2012). Migration of cardiomyocytes is essential for heart regeneration in zebrafish. *Development* **139**, 4133-4142. doi:10.1242/dev.079756
- Jacobetz, M. A., Chan, D. S., Neesse, A., Bapiro, T. E., Cook, N., Frese, K. K., Feig, C., Nakagawa, T., Caldwell, M. E., Zecchini, H. I. et al. (2013). Hyaluronan impairs vascular function and drug delivery in a mouse model of pancreatic cancer. *Gut* **62**, 112-120. doi:10.1136/gutjnl-2012-302529
- Jaffa, A. A., Usinger, W. R., McHenry, M. B., Jaffa, M. A., Lipstiz, S. R., Lackland, D., Lopes-Virella, M., Luttrell, L. M. and Wilson, P. W. (2008). Connective tissue growth factor and susceptibility to renal and vascular disease risk in type 1 diabetes. *J. Clin. Endocrinol. Metab.* **93**, 1893-1900. doi:10.1210/jc.2007-2544
- Kimmel, C. B., Ballard, W. W., Kimmel, S. R., Ullmann, B. and Schilling, T. F. (1995). Stages of embryonic development of the zebrafish. *Dev. Dyn.* **203**, 253-310. doi:10.1002/aja.1002030302
- Kuhn, B., del Monte, F., Hajjar, R. J., Chang, Y. S., Lebeche, D., Arab, S. and Keating, M. T. (2007). Periostin induces proliferation of differentiated cardiomyocytes and promotes cardiac repair. *Nat. Med.* **13**: 962-969. doi:10.1038/nm1619
- Ladage, D., Yaniz-Galende, E., Rapti, K., Ishikawa, K., Tilemann, L., Shapiro, S., Takewa, Y., Muller-Ehmsen, J., Schwarz, M., Garcia, M. J. et al. (2013). Stimulating myocardial regeneration with periostin Peptide in large mammals improves function post-myocardial infarction but increases myocardial fibrosis. *PLoS ONE* **8**, e59656. doi:10.1371/journal.pone.0059656
- Lai, S. L., Marín-Juez, R., Moura, P. L., Kuenne, C., Lai, J. K. H., Tseede, A. T., Guenther, S., Looso, M. and Stainier, D. Y. (2017). Reciprocal analyses in zebrafish and medaka reveal that harnessing the immune response promotes cardiac regeneration. *Elife* **6**, e25605. doi:10.7554/eLife.25605.030
- Lepilina, A., Coon, A. N., Kikuchi, K., Holdway, J. E., Roberts, R. W., Burns, C. G. and Poss, K. D. (2006). A dynamic epicardial injury response supports progenitor cell activity during zebrafish heart regeneration. *Cell* **127**, 607-619. doi:10.1016/j.cell.2006.08.052
- Li, R., Luo, M., Ren, M., Chen, N., Xia, J., Deng, X., Zeng, M., Yan, K., Luo, T. and Wu, J. (2014). Vitronectin regulation of vascular endothelial growth factor-mediated angiogenesis. *J. Vasc. Res.* **51**, 110-117. doi:10.1159/000360085
- Liao, Y., Smyth, G. K. and Shi, W. (2014). featureCounts: an efficient general purpose program for assigning sequence reads to genomic features. *Bioinformatics* **30**, 923-930. doi:10.1093/bioinformatics/btt656
- Linton, J. M., Martin, G. R. and Reichardt, L. F. (2007). The ECM protein nephronectin promotes kidney development via integrin alpha8beta1-mediated stimulation of Gdnf expression. *Development* **134**, 2501-2509. doi:10.1242/dev.005033
- Liu, Y.-C., Zou, X.-B., Chai, Y.-F. and Yao, Y.-M. (2014). Macrophage polarization in inflammatory diseases. *Int. J. Biol. Sci.* **10**, 520-529. doi:10.7150/ijbs.8879
- Love, M. I., Huber, W. and Anders, S. (2014). Moderated estimation of fold change and dispersion for RNA-seq data with DESeq2. *Genome Biol.* **15**, 550. doi:10.1186/s13059-014-0550-8
- Lu, X.-J., Chen, Q., Rong, Y.-J., Chen, F. and Chen, J. (2017). CXCR3.1 and CXCR3.2 Differentially Contribute to Macrophage Polarization in Teleost Fish. *J. Immunol.* **198**, 4692-4706. doi:10.4049/jimmunol.1700101
- Mably, J. D., Mohideen, M. A., Burns, C. G., Chen, J.-N. and Fishman, M. C. (2003). Heart of glass regulates the concentric growth of the heart in zebrafish. *Curr. Biol.* **13**, 2138-2147. doi:10.1016/j.cub.2003.11.055
- Marín-Juez, R., Marass, M., Gauvrit, S., Rossi, A., Lai, S.-L., Materna, S. C., Black, B. L. and Stainier, D. Y. R. (2016). Fast revascularization of the injured area is essential to support zebrafish heart regeneration. *Proc. Natl. Acad. Sci. USA* **113**, 11237-11242. doi:10.1073/pnas.1605431113
- Marín-Juez, R., El-Sammak, H., Helker, C. S. M., Kamezaki, A., Mullapuli, S. T., Bibli, S. I., Foglia, M. J., Fleming, I., Poss, K. D. and Stainier, D. Y. R. (2019). Coronary revascularization during heart regeneration is regulated by epicardial and endocardial cues and forms a scaffold for cardiomyocyte repopulation. *Dev. Cell* **51**, 503-515.e4. doi:10.1016/j.devcel.2019.10.019
- Mizutani, A., Koinuma, D., Tsutsumi, S., Kamimura, N., Morikawa, M., Suzuki, H. I., Imamura, T., Miyazono, K. and Aburatani, H. (2011). Cell type-specific target selection by combinatorial binding of Smad2/3 proteins and hepatocyte nuclear factor 4alpha in HepG2 cells. *J. Biol. Chem.* **286**, 29848-29860. doi:10.1074/jbc.M110.217745
- Mohamed, T. M. A., Ang, Y. S., Radzinsky, E., Zhou, P., Huang, Y., Eifenbein, A., Foley, A., Magnitsky, S. and Srivastava, D. (2018). Regulation of cell cycle to stimulate adult cardiomyocyte proliferation and cardiac regeneration. *Cell* **173**, 104-116.e12. doi:10.1016/j.cell.2018.02.014
- Mokalled, M. H., Patra, C., Dickson, A. L., Endo, T., Stainier, D. Y. and Poss, K. D. (2016). Injury-induced ctgfa directs glial bridging and spinal cord regeneration in zebrafish. *Science* **354**, 630-634. doi:10.1126/science.aaf2679
- Mollova, M., Bersell, K., Walsh, S., Savlia, J., Das, L. T., Park, S.-Y., Silberstein, L. E., dos Remedios, C. G., Graham, D., Colan, S. et al. (2013). Cardiomyocyte proliferation contributes to heart growth in young humans. *Proc. Natl. Acad. Sci. USA* **110**, 1446-1451. doi:10.1073/pnas.1214608110
- Mori, T., Kawara, S., Shinozaki, M., Hayashi, N., Kakinuma, T., Igarashi, A., Takigawa, M., Nakanishi, T. and Takehara, K. (1999). Role and interaction of connective tissue growth factor with transforming growth factor-beta in persistent fibrosis: a mouse fibrosis model. *J. Cell. Physiol.* **181**, 153-159. doi:10.1002/(SICI)1097-4652(199910)181:1<153::AID-JCP16>3.0.CO;2-K
- Nakerakanti, S. S., Bujor, A. M. and Trojanowska, M. (2011). CCN2 is required for the TGF-beta induced activation of Smad1-Erk1/2 signaling network. *PLoS ONE* **6**, e21911. doi:10.1371/journal.pone.0021911
- O'Shea, K. S., Liu, L. H., Kinnunen, L. H. and Dixit, V. M. (1990). Role of the extracellular matrix protein thrombospondin in the early development of the mouse embryo. *J. Cell Biol.* **111**(6 Pt 1), 2713-2723. doi:10.1083/jcb.111.6.2713
- Patra, C., Kontarakis, Z., Kaur, H., Rayrikar, A., Mukherjee, D. and Stainier, D. Y. R. (2017). The zebrafish ventricle: A hub of cardiac endothelial cells for in vitro cell behavior studies. *Sci. Rep.* **7**, 2687. doi:10.1038/s41598-017-02461-1
- Pfefferli, C. and Jaźwińska, A. (2017). The careg element reveals a common regulation of regeneration in the zebrafish myocardium and fin. *Nat. Commun.* **8**, 15151. doi:10.1038/ncomms15151
- Ponticos, M., Holmes, A. M., Shi-wen, X., Leoni, P., Khan, K., Rajkumar, V. S., Hoyles, R. K., Bou-Gharios, G., Black, C. M., Denton, C. P. et al. (2009). Pivotal role of connective tissue growth factor in lung fibrosis: MAPK-dependent transcriptional activation of type I collagen. *Arthritis. Rheum.* **60**, 2142-2155. doi:10.1002/art.24620
- Porrello, E. R., Mahmoud, A. I., Simpson, E., Hill, J. A., Richardson, J. A., Olson, E. N. and Sadek, H. A. (2011). Transient regenerative potential of the neonatal mouse heart. *Science* **331**, 1078-1080. doi:10.1126/science.1200708
- Poss, K. D., Wilson, L. G. and Keating, M. T. (2002). Heart regeneration in zebrafish. *Science* **298**, 2188-2190. doi:10.1126/science.1077857
- Proulx, K., Lu, A. and Sumanas, S. (2010). Cranial vasculature in zebrafish forms by angioblast cluster-derived angiogenesis. *Dev. Biol.* **348**, 34-46. doi:10.1016/j.ydbio.2010.08.036
- Riley, K. G., Pasek, R. C., Maulis, M. F., Peek, J., Thorel, F., Brigstock, D. R., Herrera, P. L. and Gannon, M. (2015). Connective tissue growth factor modulates adult beta-cell maturity and proliferation to promote beta-cell regeneration in mice. *Diabetes* **64**, 1284-1298. doi:10.2337/db14-1195
- Rognoni, E. and Watt, F. M. (2018). Skin cell heterogeneity in development, wound healing, and cancer. *Trends Cell Biol.* **28**, 709-722. doi:10.1016/j.tcb.2018.05.002
- Sasaki, H., Dai, M., Auclair, D., Fukai, I., Kiriya, M., Yamakawa, Y., Fujii, Y. and Chen, L. B. (2001). Serum level of the periostin, a homologue of an insect cell adhesion molecule, as a prognostic marker in nonsmall cell lung carcinomas. *Cancer* **92**, 843-848. doi:10.1002/1097-0142(20010815)92:4<843::AID-CNCR1391>3.0.CO;2-P
- Satoh, M., Nakamura, M., Akatsu, T., Shimoda, Y., Segawa, I. and Hiramori, K. (2005). Myocardial osteopontin expression is associated with collagen fibrillogenesis in human dilated cardiomyopathy. *Eur. J. Heart Fail* **7**, 755-762. doi:10.1016/j.ejheart.2004.10.019
- Saupe, F., Schwenzer, A., Jia, Y., Gasser, I., Spenlé, C., Langlois, B., Kammerer, M., Lefebvre, O., Hlushchuk, R., Rupp, T. et al. (2013). Tenascin-C downregulates wnt inhibitor dickkopf-1, promoting tumorigenesis in a neuroendocrine tumor model. *Cell Rep* **5**, 482-492. doi:10.1016/j.celrep.2013.09.014
- Senyo, S. E., Steinhauser, M. L., Pizzimenti, C. L., Yang, V. K., Cai, L., Wang, M., Wu, T.-D., Guerquin-Kern, J.-L., Lechene, C. P. and Lee, R. T. (2013). Mammalian heart renewal by pre-existing cardiomyocytes. *Nature* **493**, 433-436. doi:10.1038/nature11682
- Shi, M., Zhu, J., Wang, R., Chen, X., Mi, L., Walz, T. and Springer, T. A. (2011). Latent TGF-beta structure and activation. *Nature* **474**, 343-349. doi:10.1038/nature10152
- Tamatani, T., Kobayashi, H., Tezuka, K., Sakamoto, S., Suzuki, K., Nakanishi, T., Takigawa, M. and Miyano, T. (1998). Establishment of the enzyme-linked immunosorbent assay for connective tissue growth factor (CTGF) and its detection in the sera of biliary atresia. *Biochem. Biophys. Res. Commun.* **251**, 748-752. doi:10.1006/bbrc.1998.9543
- Torraca, V., Cui, C., Boland, R., Bebelman, J.-P., van der Sar, A. M., Smit, M. J., Siderius, M., Spaik, H. P. and Meijer, A. H. (2015). The CXCR3-CXCL11 signaling axis mediates macrophage recruitment and dissemination of mycobacterial infection. *Dis. Model. Mech.* **8**, 253-269. doi:10.1242/dmm.017756

- Tsai, C.-C., Wu, S.-B., Kau, H.-C. and Wei, Y.-H.** (2018). Essential role of connective tissue growth factor (CTGF) in transforming growth factor-beta1 (TGF-beta1)-induced myofibroblast transdifferentiation from Graves' orbital fibroblasts. *Sci. Rep.* **8**, 7276. doi:10.1038/s41598-018-25370-3
- Wang, J., Karra, R., Dickson, A. L. and Poss, K. D.** (2013). Fibronectin is deposited by injury-activated epicardial cells and is necessary for zebrafish heart regeneration. *Dev. Biol.* **382**, 427-435. doi:10.1016/j.ydbio.2013.08.012
- Wehner, D., Tsarouchas, T. M., Michael, A., Haase, C., Weidinger, G., Reimer, M. M., Becker, T. and Becker, C. G.** (2017). Wnt signaling controls pro-regenerative Collagen XII in functional spinal cord regeneration in zebrafish. *Nat. Commun.* **8**, 126. doi:10.1038/s41467-017-00143-0
- Wipff, P.-J., Rifkin, D. B., Meister, J.-J. and Hinz, B.** (2007). Myofibroblast contraction activates latent TGF-beta1 from the extracellular matrix. *J. Cell Biol.* **179**, 1311-1323. doi:10.1083/jcb.200704042
- Xi, Q., Wang, Z., Zaromytidou, A.-I., Zhang, X. H.-F., Chow-Tsang, L.-F., Liu, J. X., Kim, H., Barlas, A., Manova-Todorova, K., Kaartinen, V. et al.** (2011). A poised chromatin platform for TGF-beta access to master regulators. *Cell* **147**, 1511-1524. doi:10.1016/j.cell.2011.11.032
- Yokokawa, T., Sugano, Y., Nakayama, T., Nagai, T., Matsuyama, T. A., Ohta-Ogo, K., Ikeda, Y., Ishibashi-Ueda, H., Nakatani, T., Yasuda, S. et al.** (2016). Significance of myocardial tenascin-C expression in left ventricular remodelling and long-term outcome in patients with dilated cardiomyopathy. *Eur. J. Heart Fail* **18**, 375-385. doi:10.1002/ejhf.464
- Yoshinaga, K., Obata, H., Jurukovski, V., Mazzieri, R., Chen, Y., Zilberberg, L., Huso, D., Melamed, J., Prijatelj, P., Todorovic, V. et al.** (2008). Perturbation of transforming growth factor (TGF)-beta1 association with latent TGF-beta binding protein yields inflammation and tumors. *Proc. Natl. Acad. Sci. USA* **105**, 18758-18763. doi:10.1073/pnas.0805411105
- Zhang, Y., Handley, D., Kaplan, T., Yu, H., Bais, A. S., Richards, T., Pandit, K. V., Zeng, Q., Benos, P. V., Friedman, N. et al.** (2011). High throughput determination of TGF-beta1/SMAD3 targets in A549 lung epithelial cells. *PLoS ONE* **6**, e20319. doi:10.1371/journal.pone.0020319
- Zhang, W., Zheng, J., Chen, J. and Huang, L.** (2017). The influence of connective tissue growth factor on rabbit ligament injury repair. *Saudi Pharm. J.* **25**, 498-503. doi:10.1016/j.jsps.2017.04.013
